1           **Single-component multilayered self-assembling nanoparticles presenting**  
2           **rationally designed glycoprotein trimers as Ebola virus vaccines**

3  
4   Linling He<sup>1\*</sup>, Anshul Chaudhary<sup>1\*</sup>, Xiaohe Lin<sup>1\*</sup>, Cindy Sou<sup>1</sup>, Tanwee Alkutkar<sup>1</sup>, Sonu Kumar<sup>1</sup>,  
5           Timothy Ngo<sup>1</sup>, Ezra Kosviner<sup>1</sup>, Gabriel Ozorowski<sup>1</sup>, Robyn L. Stanfield<sup>1</sup>,  
6           Andrew B. Ward<sup>1</sup>, Ian A. Wilson<sup>1,3†</sup>, and Jiang Zhu<sup>1,2†</sup>

7  
8   <sup>1</sup>Department of Integrative Structural and Computational Biology, <sup>2</sup>Department of Immunology  
9   and Microbiology, <sup>3</sup>Skaggs Institute for Chemical Biology, The Scripps Research Institute, La  
10 Jolla, California 92037, USA

11  
12   \* These authors contributed equally to this work

13   † Co-corresponding authors (to whom correspondence should be addressed)

14   IAW: Phone (858) 784-9706; Email: [wilson@scripps.edu](mailto:wilson@scripps.edu)

15   JZ: Phone (858) 784-8157; Email: [jiang@scripps.edu](mailto:jiang@scripps.edu)

16 **Running title**

17 Design of protein nanoparticle vaccines for Ebola virus

18

19 **Abstract (150 words)**

20 Ebola virus (EBOV) glycoprotein (GP) can be recognized by neutralizing antibodies (NAbs) and  
21 is the main target for vaccine design. Here, we first investigate the contribution of the stalk and  
22 heptad repeat 1-C (HR1<sub>C</sub>) regions to GP metastability. Specific stalk and HR1<sub>C</sub> modifications in  
23 a mucin-deleted form (GP $\Delta$ muc) increase trimer yield, whereas alterations of HR1<sub>C</sub> exert a more  
24 complex effect on thermostability. Crystal structures are determined to validate two rationally  
25 designed GP $\Delta$ muc trimers in their unliganded state. We then display a modified GP $\Delta$ muc trimer  
26 on reengineered nanoparticles that encapsulate a layer of locking domains (LD) and a cluster of  
27 helper T-cell epitopes. In mice and rabbits, GP trimers and nanoparticles elicit cross-ebolavirus  
28 NAbs, as well as non-NAbs that enhance pseudovirus infection. Repertoire sequencing reveals  
29 quantitative profiles of vaccine-induced B-cell responses. This study demonstrates a promising  
30 vaccine strategy for filoviruses, such as EBOV, based on GP stabilization and nanoparticle  
31 display.

32

33 **Keywords**

34 Ebola virus (EBOV), filovirus, heptad repeat 1-C (HR1<sub>C</sub>), HR2 stalk, glycoprotein (GP),  
35 nanoparticle vaccine, vaccine, viral hemorrhagic fever (VHF)

## 36 **Introduction**

37 Ebola virus (EBOV), a member of the *Ebolavirus* genus in the *Filoviridae* family<sup>1</sup>, can cause a  
38 severe human disease known as viral hemorrhagic fever (VHF)<sup>2,3</sup>. EBOV was solely responsible  
39 for the largest filovirus outbreak in history in 2013-2016 that caused 11,325 deaths<sup>4</sup>. The EBOV  
40 outbreak in 2019 led to 2,103 deaths<sup>5</sup> and was declared an international emergency on July 17,  
41 2019, by the World Health Organization (WHO). In recent years, significant progress has been  
42 made to counter this deadly virus. Neutralizing antibodies (NAbs) provided effective  
43 therapeutics for EBOV infection<sup>6-9</sup>, as demonstrated by the ZMapp cocktail of murine chimeric  
44 antibodies<sup>10,11</sup>, as well as human antibodies<sup>12,13</sup>. Vaccines based on different delivery systems  
45 have been tested in humans<sup>14-17</sup>, of which rVSV-ZEBOV (Ervebo<sup>®</sup>) – a replication-competent  
46 recombinant vesicular stomatitis virus (VSV) expressing a *Zaire* EBOV glycoprotein (GP)<sup>18-21</sup> –  
47 was recently approved by the U.S. Food and Drug Administration (FDA) for human use.  
48 However, GP-specific antibody titers did not noticeably increase seven days after rVSV-ZEBOV  
49 vaccination in humans<sup>15,22</sup>, in contrast to prior findings in nonhuman primates (NHPs)<sup>23</sup>.  
50 Additionally, a recent study reported the neurotropism of rVSV-ZEBOV that resulted in damage  
51 to the eye and brain in neonatal mice<sup>24</sup>. Antibody-dependent enhancement (ADE) of infection  
52 was also found for antibodies isolated from human survivors<sup>25</sup>, suggesting that weak or non-  
53 NAbs induced by a suboptimal vaccine may cause adverse effects. Currently, no protein-based  
54 subunit vaccines are available but may be needed to boost the NAb response in the rVSV-  
55 ZEBOV-vaccinated population.

56 EBOV GP, a trimer of GP1-GP2 heterodimers responsible for cell entry<sup>26</sup>, is recognized  
57 by the humoral immune response during natural infection<sup>27-29</sup>. The outbreak in 2013-2016 led to  
58 an enduring campaign to identify and characterize NAbs for EBOV<sup>30</sup> and other filoviruses, such

59 as Marburg virus (MARV)<sup>31-33</sup>. As a result, panels of NAb were isolated from human survivors,  
60 vaccinated humans, and immunized animals<sup>12,34-39</sup>. Crystallography<sup>40-43</sup> and electron microscopy  
61 (EM)<sup>44-47</sup> revealed multiple sites of vulnerability on EBOV GP. A systematic study of 171  
62 monoclonal antibodies (mAbs) defined eight epitopes<sup>48</sup>, six of which can be recognized by  
63 broadly neutralizing antibodies (bNAbs)<sup>9</sup>. Meanwhile, over the last decade, HIV-1 vaccine  
64 research has been driven largely by a strategy that focuses on bNAb isolation, the structural  
65 analysis of bNAb-envelope glycoprotein (Env) interactions, and immunogen design<sup>49,50</sup>. An  
66 important milestone in recent HIV-1 research was the development of native-like Env trimers,  
67 which have emerged as a promising vaccine platform<sup>51,52</sup>. In contrast to the growing number of  
68 EBOV (b)NAbs and their structures with GP, little attention has been given to the rational design  
69 of EBOV GP. As class-I viral fusion proteins<sup>53,54</sup>, HIV-1 Env and EBOV GP are inherently  
70 metastable, which is a property that has been studied in depth for HIV-1 Env<sup>55-57</sup>, but not yet for  
71 EBOV GP. Another advance in the HIV-1 vaccine field was to display Env trimers on self-  
72 assembling nanoparticles (NPs)<sup>58,59</sup>. Recombinant virus-like particles (VLPs) can protect against  
73 EBOV challenge in animals<sup>60-62</sup>, but manufacturing difficulties have hindered their development  
74 as human vaccines<sup>63</sup>. Therefore, the multivalent display of stabilized EBOV GP trimers on NPs  
75 may provide a promising solution for developing VLP-type protein subunit vaccines, but this  
76 possibility has yet to be explored.

77         Here, we investigated the causes of EBOV GP metastability and designed multilayered  
78 NP immunogens for in vivo evaluation. To facilitate GP purification, we developed an  
79 immunoaffinity column based on mAb100<sup>12,42</sup>, which is specific to native-like, trimeric GP. We  
80 first examined the contribution of two regions in GP2, namely the stalk and heptad repeat 1-C  
81 (HR1<sub>C</sub>) regions, to GP metastability in a mucin-deleted *Zaire* EBOV GP construct (GP $\Delta$ muc).

82 We extended the soluble GP ectodomain (GP<sub>ECTO</sub>) in the stalk region from residue 632 (C  
83 terminus of HR2) to 637 and introduced a W615L mutation based on a comparison of EBOV and  
84 MARV GPs. We also assessed eight proline mutations in HR1<sub>C</sub>, a region equivalent to the HR1  
85 bend that is essential to HIV-1 Env metastability<sup>55-57</sup>, for their ability to prevent the GP transition  
86 from pre- to postfusion states. Both the stalk and HR1<sub>C</sub>-proline mutations increased trimer yield,  
87 whereas the latter exhibited a complex effect on GP thermostability. In addition, newly  
88 engineered inter-protomer disulfide bonds (SS) were tested for their ability to increase trimer  
89 stability. Crystal structures were solved for two redesigned GPΔmuc trimer constructs to validate  
90 the stalk and HR1<sub>C</sub>-proline mutations at the atomic level. We then displayed a redesigned  
91 GPΔmuc trimer on ferritin (FR), E2p, and I3-01 NPs. Locking domains (LDs) and helper T-cell  
92 epitopes were incorporated into E2p and I3-01 60-mers<sup>55,64</sup> to stabilize the NP shell from the  
93 inside and create multilayered NP carriers. In mice and rabbits, GP trimer and NP vaccines  
94 induced distinct antibody responses, but enhanced pseudoviral infection was observed for some  
95 constructs. The next-generation sequencing (NGS) of GP-specific B cells revealed different  
96 patterns for NPs that presented large trimeric spikes versus smaller antigens, such as hepatitis C  
97 virus (HCV) E2 core<sup>65</sup>. Our study thus reports on critical factors for EBOV GP metastability,  
98 single-component multilayered self-assembling NPs for the development of VLP-type vaccines,  
99 and a subunit vaccine strategy that is applicable to other filoviruses.

## 100 **Results**

### 101 **Tag-free immunoaffinity purification of EBOV GP trimers**

102 EBOV GP contains a heavily glycosylated mucin-like domain (MLD) that shields the glycan cap  
103 and neutralizing epitopes in GP1 and GP2 (**Fig. 1a**). A soluble, mucin-deleted form of *Zaire*  
104 EBOV GP (GPΔmuc) that produced the first<sup>40</sup> and subsequent high-resolution<sup>66</sup> crystal structures

105 was used as a basic construct to investigate GP metastability (**Fig. 1a**). In HIV-1 vaccine  
106 research, immunoaffinity chromatography (IAC) columns based on bNAbs 2G12 and  
107 PGT145<sup>67,68</sup> have been widely used to purify native-like Env trimers. 2G12 targets a glycan  
108 patch on a single gp120, whereas PGT145 binds the trimer apex and can separate closed trimers  
109 from partially open and misfolded Envs. These two bNAb columns have also been used to purify  
110 HIV-1 gp140-presenting NPs<sup>55,64,69</sup>. Likewise, GP-specific IAC columns may provide useful  
111 tools for EBOV vaccine research. Corti et al. recently identified two potent NAbs, mAb114 and  
112 mAb100, from a human survivor<sup>12</sup>. Misasi et al. elucidated the structural basis for neutralization  
113 by mAb114, which targets the receptor binding site (RBS), and mAb100, which interacts with  
114 the GP1/GP2 interface and internal fusion loop (IFL) of two GP protomers<sup>42</sup>. Here, we examined  
115 the utility of mAb114 and mAb100 in IAC columns. The GP $\Delta$ muc constructs with and without a  
116 C-terminal foldon motif were transiently expressed in 250 ml HEK293F cells and purified on an  
117 antibody column prior to size-exclusion chromatography (SEC) using a Superdex 200 10/300 GL  
118 column and blue native polyacrylamide gel electrophoresis (BN-PAGE). With mAb114, both  
119 GP $\Delta$ muc samples showed aggregate (~9 ml), dimer (~12 ml), and monomer (~13.5-14 ml) peaks  
120 in the SEC profiles, but only GP $\Delta$ muc-foldon showed a visible trimer peak (~10.5-11 ml) in SEC  
121 and a band of slightly less than 440 kD on the BN gel (**Fig. 1b**). Following mAb100 purification,  
122 GP $\Delta$ muc produced a low overall yield, whereas GP $\Delta$ muc-foldon demonstrated high trimer purity  
123 without any monomer or dimer peaks. Consistently, GP $\Delta$ muc-foldon registered a single trimer  
124 band on the BN gel (**Fig. 1c**). Altogether, both mAb114 and mAb100 can be used to purify  
125 EBOV GP, but mAb100 offers a more effective IAC method for purifying native-like trimers  
126 due to its recognition of a quaternary epitope. The stark difference in trimer yield between the

127 two GP $\Delta$ muc constructs after mAb100 purification also suggests a strong tendency for trimer  
128 dissociation without foldon.

### 129 **Effect of HR2 stalk on EBOV GP metastability**

130 Previously, we demonstrated that the gp41 ectodomain (gp41<sub>ECTO</sub>) is the source of HIV-1 Env  
131 metastability<sup>55</sup>. Unlike HIV-1 Env<sup>70,71</sup>, in which the gp41 HR2 helix is packed against the bottom  
132 of the gp41 HR1 helix and gp120 C1/C5 loops and forms extensive interactions at the gp140  
133 trimer base<sup>70,71</sup>, EBOV GP has a long, extended HR2 stalk (**Fig. 1a**, right). Even in the high-  
134 resolution GP $\Delta$ muc structures<sup>66,72,73</sup>, the HR2 stalk still contains less helical content than most  
135 coiled-coils in the Protein Data Bank (PDB), ~15 versus ~30 aa, and becomes less regular and  
136 unwound toward the C terminus, suggesting an inherent instability in HR2 (**Fig. 1d**, left).  
137 Recently, King et al. solved a 3.17 Å-resolution structure for MARV GP $\Delta$ muc bound to a human  
138 mAb, MR191<sup>32</sup>. Surprisingly, the MARV HR2 stalk adopted a well-formed coiled-coil with  
139 canonical sidechain packing along the three-fold axis (**Fig. 1d**, right). To identify the cause of  
140 this difference in HR2, we obtained EBOV and MARV GP sequences from the Virus Pathogen  
141 Database and Analysis Resource (ViPR, <https://www.viprbrc.org>). A total of 274 EBOV GPs  
142 and 87 MARV GPs were used for sequence conservation analysis of the region spanning the  
143 CX<sub>6</sub>CC motif and HR2 stalk, residues 601-632 for EBOV and residues 602-633 for MARV,  
144 respectively (**Fig. 1d**, middle). Most inward-facing amino acids were conserved except for W615  
145 in EBOV and the equivalent L616 in MARV. Indeed, structural analysis revealed a critical  
146 difference at this position: the three W615s in EBOV GP (PDB: 5JQ3) formed a wide triangle at  
147 the neck of the coiled-coil with a C $\alpha$  distance of 11.1 Å and C $\beta$  distance of 9.0 Å; in contrast,  
148 with the smaller and more hydrophobic L616, a C $\alpha$  distance of 10.5 Å and C $\beta$  distance of 8.3 Å

149 were observed in MARV GP (PDB: 6BP2). This finding suggests that a W615L mutation may  
150 improve the stability of EBOV GP.

151 To further examine the effect of the HR2 stalk on GP trimer stability, we created three  
152 GP $\Delta$ muc constructs by replacing residues 617-632 with the coiled-coil from a GCN4 leucine  
153 zipper (PDB: 2WPZ, residues 3-33) and by extending the C terminus to D637 and N643 to  
154 include a newly identified bNAb epitope<sup>74</sup> that spans HR2 and the membrane-proximal external  
155 region (MPER), termed “L” and “Ext”, respectively (**Fig. S1a**). Notably, D637 is also important  
156 for proteolytic cleavage by tumor necrosis factor  $\alpha$ -converting enzyme (TACE), which enables  
157 GP to be shed from the virus surface<sup>75</sup>. These three constructs were characterized by SEC and  
158 BN-PAGE following transient expression in 250-ml HEK293F cells and purification on an  
159 antibody column. With mAb114 purification, all three HR2 stalk variants showed a greater  
160 trimer yield than wildtype GP $\Delta$ muc in SEC (**Fig. S1b**), with trimer bands observed only for the  
161 stalk variants on the BN gel (**Fig. S1c**, left). Upon mAb100 purification, all three HR2 stalk  
162 variants showed more visible trimer bands than wildtype GP $\Delta$ muc on the BN gel (**Fig. S1c**,  
163 right). Of the three designs, “2WPZ” improved GP stability at the cost of replacing the entire  
164 HR2 stalk in GP2 but provided supporting evidence for the W615L mutation, which presumably  
165 increases coiled-coil content in the HR2 stalk (**Fig. 1d**). Overall, the “L” extension appeared to  
166 be a more practical solution as it modestly improved trimer stability with the inclusion of a  
167 recently identified bNAb epitope<sup>74</sup>.

168 We next combined the W615L mutation and “L” extension in a single construct named  
169 GP $\Delta$ muc-W615L-L-foldon, or simply GP $\Delta$ muc-WL<sup>2</sup>-foldon (**Fig. 1e**). This construct, along with  
170 GP $\Delta$ muc-foldon, was transiently expressed in 1-liter HEK293F cells and purified by an mAb100



171 column prior to SEC on a HiLoad Superdex 200 16/600 GL column (**Fig. 1f**). In three production  
172 runs, GP $\Delta$ muc-WL<sup>2</sup>-foldon consistently outperformed the wildtype construct, showing a twofold  
173 higher trimer peak in the SEC profile and a ~2.6-fold greater trimer yield after SEC (1.3 mg  
174 versus 0.5 mg). Thermostability was assessed by differential scanning calorimetry (DSC) for two  
175 purified GP trimers (**Fig. 1g**). The thermal denaturation midpoint ( $T_m$ ) value for the stalk-  
176 stabilized trimer was 3 °C higher than the wildtype trimer (67 °C versus 64 °C). Stalk  
177 stabilization also increased the onset temperature ( $T_{on}$ ) from 52.4 °C to 62.5 °C, with a narrower  
178 half width of the peak ( $\Delta T_{1/2}$ ) than the wildtype trimer (3.8 °C versus 5.1 °C). Antigenicity was  
179 assessed for four mAb100/SEC-purified EBOV GP trimers in the enzyme-linked immunosorbent  
180 assay (ELISA) (**Fig. 1h**, **Fig. S1d** and **S1e**). Ten antibodies were tested, including three NAbs  
181 targeting the base (KZ52<sup>76</sup>, c2G4, and c4G7<sup>10</sup>), two human NAbs<sup>12</sup> – mAb100 (IFL) and  
182 mAb114 (RBS), a non-NAb directed to the glycan cap (c13C6<sup>10</sup>), and four pan-ebolavirus  
183 bNAbs targeting the conserved HR2-MPER epitope (BDBV223<sup>74</sup>) and IFL (ADI-15878, ADI-  
184 15946<sup>37,38</sup>, and CA45<sup>36,77</sup>). The GP $\Delta$ muc trimer showed notably improved antibody binding with  
185 respect to the GP<sub>ECTO</sub> trimer, with an up to 7.6-fold difference in the half maximal effective  
186 concentration ( $EC_{50}$ ), indicating that the MLD can shield much of the GP from antibody  
187 recognition. The two stalk modifications only modestly increased recognition of the RBS, stalk,  
188 and IFL epitopes by their respective (b)NAbs except for CA45<sup>36,77</sup>, for which the WL<sup>2</sup> mutation  
189 led to a 5.6-fold change in  $EC_{50}$  compared with GP $\Delta$ muc-foldon. A 50% reduction in  $EC_{50}$   
190 observed for GP $\Delta$ muc-WL<sup>2</sup>-foldon binding to BDBV223 confirmed that the L extension into  
191 MPER can improve the recognition of this conserved bNAb epitope at HR2-MPER<sup>74</sup>. King et al.  
192 proposed two scenarios for ebolavirus GP to expose the BDBV223 epitope: one of the HR2  
193 helices is splayed apart from the coiled-coil, or the whole GP is lifted or tilted with respect to the

194 membrane<sup>74</sup>. It is perhaps more plausible that ebolavirus GP may adopt an open stalk  
195 conformation similar to the parainfluenza virus 5 (PIV5) fusion (F) protein, which has a long  
196 HR-B stalk<sup>78</sup>. Altogether, WL<sup>2</sup> considerably improved the trimer yield and thermostability for  
197 EBOV GP but only exerted a modest effect on antigenicity, because the C-terminal foldon motif  
198 in these constructs could retain GP $\Delta$ muc in a trimeric form, which is required for (b)NAb  
199 binding.

### 200 **Effect of the HR1<sub>C</sub> bend on EBOV GP metastability**

201 Structures of the prefusion glycoprotein and the postfusion six-helix-bundle have been  
202 determined for HIV-1 Env<sup>70,71,79</sup> and EBOV/MARV GP<sup>40,80-82</sup>. Previously, we identified the N  
203 terminus of HR1 (HR1<sub>N</sub>, residues 547-569) as a major cause of HIV-1 Env metastability<sup>56</sup>,  
204 because this region undergoes a drastic conformational change during fusion. We and others  
205 stabilized diverse HIV-1 Envs by replacing the 22-aa HR1<sub>N</sub> with an optimized 8-aa loop<sup>55-57,83</sup>.  
206 The equivalent region in EBOV GP (residues 576-583), HR1<sub>C</sub><sup>40</sup>, forms a 21-nm triangular  
207 interior at around two-thirds of the height of the chalice that spans 94-Å wide at the rim (**Fig.**  
208 **2a**). This prefusion HR1<sub>C</sub> bend will refold to two helical turns in the center of a long helix in the  
209 postfusion state (**Fig. 2b**, left). Here, we hypothesized that HR1<sub>C</sub> is essential to EBOV GP  
210 metastability. Since HR1<sub>C</sub> in wildtype EBOV GP is equivalent in length (8 aa) to a truncated  
211 engineered HR1<sub>N</sub> in the prefusion-optimized HIV-1 Env<sup>55,56</sup>, metastability in EBOV GP may not  
212 be as sensitive to HR1<sub>C</sub> length and likely requires a different solution. We thus hypothesized that  
213 a proline mutation in one of the eight residues in HR1<sub>C</sub> can rigidify the HR1<sub>C</sub> bend and improve  
214 EBOV GP trimer stability (**Fig. 2b**, right). Similar proline mutations in HR1<sub>N</sub> have effectively  
215 stabilized HIV-1 Env trimers<sup>56,68</sup>. To examine this possibility, eight GP $\Delta$ muc-W615L variants,  
216 each with a proline mutation in HR1<sub>C</sub> (termed P<sup>1</sup> to P<sup>8</sup>) but without the L extension and C-

217 terminal foldon motif, were characterized by SEC after 250-ml 293 F expression and IAC. After  
218 mAb114 purification, most proline mutations had little effect on the distribution of GP species  
219 except for T577P (P<sup>2</sup>) and L579P (P<sup>4</sup>), which appeared to have a trimer peak at ~11 ml in their  
220 SEC profiles (**Fig. 2c**). After mAb100 purification, only P<sup>2</sup> and P<sup>4</sup> produced any trimer yield,  
221 with a higher SEC peak observed for P<sup>2</sup> that corresponded to well-formed trimers (**Fig. 2c**). The  
222 mAb100-purified GP was analyzed by BN-PAGE, which showed a trimer band for P<sup>2</sup> and P<sup>4</sup>  
223 (**Fig. 2d**). Overall, the T577P mutation (P<sup>2</sup>) can considerably increase trimer yield, whereas the  
224 L579P mutation (P<sup>4</sup>) has a less pronounced effect.

225         Next, the T577P mutation (P<sup>2</sup>) was incorporated into the GPΔmuc-WL<sup>2</sup>-foldon construct,  
226 resulting in a construct named GPΔmuc-WL<sup>2</sup>P<sup>2</sup>-foldon. This construct was transiently expressed  
227 in 1-liter 293 F cells and purified using an mAb100 column for SEC characterization on a  
228 HiLoad Superdex 200 16/600 GL column. In three production runs, GPΔmuc-WL<sup>2</sup>P<sup>2</sup>-foldon  
229 generated a trimer peak that was two- and fourfold higher than GPΔmuc-WL<sup>2</sup>-foldon and  
230 wildtype GPΔmuc-foldon, respectively, with an average yield of 2.6 mg after SEC (**Fig. 2e**, left).  
231 Protein collected in the range of 55.5-62.0 ml was analyzed by BN-PAGE, which displayed a  
232 trimer band across all fractions without any detectable impurity (**Fig. 2e**, right). The  
233 thermostability of GPΔmuc-WL<sup>2</sup>P<sup>2</sup>-foldon was determined by DSC after mAb100 and SEC  
234 purification. Unexpectedly, two transition peaks were observed in the thermogram, one  
235 registered at a lower T<sub>m</sub> of 61.6 °C and the other at a higher T<sub>m</sub> of 68.2 °C (**Fig. 2f**, left). To this  
236 end, a second construct containing the L579P mutation (P<sup>4</sup>), termed GPΔmuc-WL<sup>2</sup>P<sup>4</sup>-foldon,  
237 was also assessed by DSC (**Fig. 2f**, right). Although only one peak was observed in the  
238 thermogram with a T<sub>m</sub> of 67.0 °C, a slight widening at the onset of the peak suggested a similar  
239 unfolding behavior upon heating. Thus, DSC revealed the complexity associated with a proline-

240 rigidified HR1<sub>C</sub> bend, which may increase the trimer yield at the cost of reducing or modifying  
241 the GP thermostability profile. The antigenicity of GPΔmuc-WL<sup>2</sup>P<sup>2</sup>-foldon was first assessed by  
242 ELISA using the same panel of 10 antibodies (**Fig. 2g**, **Fig. S1f** and **S1g**). GPΔmuc-WL<sup>2</sup>P<sup>2</sup>-  
243 foldon appeared to bind more favorably to bNAbs BDBV223 than GPΔmuc-WL<sup>2</sup>-foldon, with a  
244 twofold reduction in EC<sub>50</sub>. In the bio-layer interferometry (BLI) analysis (**Fig. 2h** and **Fig. S1h**),  
245 the GPΔmuc-WL<sup>2</sup>P<sup>2</sup>-foldon trimer and wildtype GPΔmuc-foldon trimer yielded nearly  
246 indistinguishable kinetic profiles, with nano- to picomolar equilibrium dissociation constant ( $K_D$ )  
247 values, consistent with the fast on-rates and slow off-rates in antibody binding.

248 Our results demonstrated the importance of HR1<sub>C</sub> to EBOV GP metastability and the  
249 perhaps unexpected sensitivity of HR1<sub>C</sub> to proline mutation. Recently, Rutten et al. tested proline  
250 mutations in HR1<sub>C</sub> along with a K588F mutation to stabilize filovirus GP trimers<sup>84</sup>. A similar  
251 increase in trimer yield was observed for the T577P mutant, but the reported thermostability data  
252 appeared to be inconsistent with our DSC measurements. Further investigations are thus  
253 warranted to understand the role of HR1<sub>C</sub> in filovirus-cell fusion and GP stability. Nevertheless,  
254 the combined stalk/HR1<sub>C</sub> modification, WL<sup>2</sup>P<sup>2</sup>, appeared to have no effect on GP binding to  
255 diverse (b)NAbs.

## 256 **GP stabilization with inter-protomer disulfide bonds**

257 Engineered disulfide (SS) bonds have been used to stabilize viral glycoproteins, as demonstrated  
258 for HIV-1 Env<sup>68</sup>, respiratory syncytial virus (RSV) F<sup>85</sup>, and Lassa virus (LASV) GP complex  
259 (GPC)<sup>86</sup>. EBOV GP already contains an endogenous SS bond linking GP1 and GP2 (C53-C609).  
260 Thus, we examined whether inter-protomer SS bonds can be used to stabilize trimer formation  
261 and lock the GP in a “closed” trimer. Based on a high-resolution EBOV GPΔmuc structure (PDB

262 ID: 5JQ3), we identified inter-protomer amino acid pairs whose  $C_{\beta}$ - $C_{\beta}$  distances are within a  
263 cutoff of 4.72 Å defined by Rosetta<sup>87</sup> (**Fig. S2a**). Of the nine pairs that were identified, three  
264 were removed after visual inspection, because they may interfere with an existing SS bond or a  
265 hydrophobic cluster. The remaining six pairs were divided into three groups: IFL-head group  
266 (SS1/2/4), IFL-NHR group (SS/5), and HR2 group (SS6) (**Fig. S2b**). Six GPΔmuc-SS constructs  
267 without C-terminal foldon were designed and characterized by SEC following transient  
268 expression in 250-ml 293 F cells and purification using an mAb114 column or mAb100 column  
269 (**Fig. S2c**). Diverse SEC profiles were observed for the mAb114-purified SS variants, with SS2  
270 showing a notable trimer fraction. Upon mAb100 purification, only SS2, SS3, and SS5 resulted  
271 in a measurable protein yield, with SS2 showing a clean trimer peak without dimer/monomer  
272 species. The BN-PAGE analysis of mAb114 and mAb100-purified SS variants exhibited  
273 consistent patterns, with S22 showing a trimer band slightly below 440 kD on the gel (**Fig. S2d**).  
274 However, the incorporation of SS2, SS3, or SS5 into the GPΔmuc-foldon construct led to  
275 abnormal SEC profiles regardless of the antibody column used for purification, suggesting their  
276 incompatibility with the foldon trimerization motif (**Fig. S2e**). To this end, antigenicity was  
277 assessed only for the mAb100/SEC-purified GPΔmuc-SS2 trimer. In the ELISA, GPΔmuc-SS2  
278 showed identical or improved antibody binding compared with GPΔmuc-foldon, with a 3.7-fold  
279 reduction in  $EC_{50}$  for bNAb CA45 (**Fig. S2f** and **S2g**). In summary, a well-positioned inter-  
280 protomer SS bond (e.g., between the GP1 head and GP2 IFL) can stabilize the EBOV GP trimer,  
281 with no adverse effect on antigenicity.

## 282 **Crystallographic analysis of redesigned EBOV GPΔmuc trimers**

283 To understand how the HR2 stalk and HR1<sub>C</sub> mutations affect EBOV GP, we determined crystal  
284 structures for the unliganded GPΔmuc-foldon with WL<sup>2</sup> and WL<sup>2</sup>P<sup>2</sup> at 2.3 Å and 3.2 Å,

285 respectively (**Fig. S3, Fig. 3**). Both proteins showed a three-lobed, chalice-like trimer  
286 structure<sup>40,66</sup>. WL<sup>2</sup>/WL<sup>2</sup>P<sup>2</sup> yielded C $\alpha$  root-mean-square deviations (RMSDs) of 0.9/1.6 Å (for  
287 367/382 residues) at the single protomer level and 1.25/1.23 Å (for 1103/1145 residues) at the  
288 trimer level, respectively, relative to wildtype GP (PDB ID: 5JQ3)<sup>66</sup>. WL<sup>2</sup>P<sup>2</sup> yielded a more  
289 complete structure than WL<sup>2</sup> at the glycan cap (R302-V310) and HR2 stalk (I627-D637) (**Fig. S3,**  
290 **Fig. 3**). In the WL<sup>2</sup>P<sup>2</sup> structure, the glycan cap covers the RBS with glycan moieties visible for  
291 N238/N257/N268 in GP1 and N563 in GP2. In the WL<sup>2</sup> structure, the glycan cap covers the RBS  
292 with glycan moieties visible for N238/N257 in GP1 and N563/N618 in GP2 (**Fig. S3b**). GP1  
293 consists mainly of  $\beta$ -strands, which form a broad semicircular groove that clamps the  $\alpha$ 3 helix  
294 and  $\beta$ 19- $\beta$ 20 strands in GP2 (**Fig. 3a**). The T577P mutation appeared to have minimal effect on  
295 conformation of the HR1<sub>C</sub> bend, as indicated by a C $\alpha$  RMSD of 0.2 Å for this 8-aa segment (**Fig.**  
296 **3b**, left). In the WL<sup>2</sup>P<sup>2</sup> structure, the backbone carbonyl (CO) groups of R574, A575, and T576  
297 in one protomer formed moderate-to-strong hydrogen bonds with the guanidinium moiety of  
298 R164 in an adjacent protomer, whereas only one CO-NH distance was within the 3.5 Å cutoff in  
299 wildtype GP $\Delta$ muc<sup>66</sup>. We previously hypothesized that a bulky, inward-facing W615 at the top of  
300 the coiled-coil destabilizes the HR2 stalk, whereas the W615L mutation would improve its  
301 packing (**Fig. 1d**). Indeed, W615L exerted a positive effect on the stalk structure (**Fig. 3b,**  
302 bottom center and right). The C $\alpha$ -C $\alpha$ /C $\beta$ -C $\beta$  distances between two W615s of adjacent protomers  
303 in wildtype GP $\Delta$ muc<sup>66</sup>, 11.1/9.0 Å, were reduced to 10.1/8.0 Å and 10.6/8.2 Å in WL<sup>2</sup> and  
304 WL<sup>2</sup>P<sup>2</sup>, respectively (**Fig. S3, Fig. 3b**, bottom center and right). As a result, the coiled-coil  
305 region in the EBOV HR2 stalk added one more helical turn (D624-V631), thereby resembling  
306 the MARV HR2 stalk (**Fig. 1d**, right). The L extension in the WL<sup>2</sup>P<sup>2</sup> structure could be fully  
307 modeled to D637 as a well-ordered loop anchored to the C-terminal foldon motif (**Fig. 3b**,

308 bottom center), rendering a complete HR2 stalk and partial MPER. The superposition of HR2  
309 stalks, from R596 up to D637, yielded C $\alpha$  RMSDs of 1.5 Å, 2.1 Å, and 1.9 Å relative to EBOV-  
310 Mayinga (PDB ID: 5JQ3), SUDV (PDB ID: 3S88), and BDBV (PDB ID: 6EA5) GPs,  
311 respectively (**Fig. 3b**, right), suggesting inherent structural variability in this region.

312 The WL<sup>2</sup>P<sup>2</sup> structure was then compared to a recently reported *Makona* GP $\Delta$ mic  
313 structure (PDB ID: 6VKM, 3.5 Å) that contained the T577P/K588F mutation (**Fig. S4**). In total,  
314 353 of 398 residues in the WL<sup>2</sup>P<sup>2</sup> structure matched the double mutant with a C $\alpha$  RMSD of 0.9  
315 Å. A more complete cathepsin cleavage loop (between  $\beta$ 13 and  $\beta$ 14, residues 190-210) was  
316 observed in WL<sup>2</sup>P<sup>2</sup> than in the double mutant, showing 10 more flanking residues, five on each  
317 side, of the loop that bridges over the IFL and interacts with IFL-directed NAb such as  
318 mAb100<sup>42</sup>. In addition, more electron density was observed for the  $\beta$ 18 loop of the glycan cap  
319 (residues 294-310) and the stalk in WL<sup>2</sup>P<sup>2</sup> than in the double mutant (**Fig. S4b**, top right). For  
320 the HR1<sub>C</sub> bend, WL<sup>2</sup>P<sup>2</sup> showed a C $\alpha$  RMSD of 0.3 Å and more favorable hydrogen bonding  
321 patterns (**Fig. S4b**, bottom left). A C $\alpha$  RMSD of 1.7 Å was obtained for the IFL region between  
322 the two structures (**Fig. S4b**, bottom right). Lastly, the WL<sup>2</sup>P<sup>2</sup> structure was docked into a panel  
323 of known GP/antibody complexes (**Fig. S5a**). Overall, WL<sup>2</sup>P<sup>2</sup> preserved all critical GP-antibody  
324 interactions (**Fig. S5b**). The mAb100/GP complex is of most interest, because mAb100 was used  
325 to purify GP trimers. Cryo-EM revealed additional density near the mAb100 light chain that  
326 likely corresponds to portions of the cathepsin cleavage loop<sup>42</sup>, but this density was not observed  
327 in a 6.7 Å crystal structure of the same complex (PDB ID: 5FHC)<sup>42</sup>. In the WL<sup>2</sup>P<sup>2</sup> structure, the  
328 flanking region on the  $\beta$ 13 side extended to H197 (**Fig. S4**), which would be in proximity to the  
329 mAb100 light chain in the WL<sup>2</sup>P<sup>2</sup>/mAb100 complex.

330 The crystal structures validated the stalk mutation WL<sup>2</sup> and its combination with the  
331 HR1<sub>C</sub> mutation, WL<sup>2</sup>P<sup>2</sup>, in addition to providing atomic details for regions that were absent in  
332 previously reported GP structures. The WL<sup>2</sup>P<sup>2</sup> structure also provides an explanation for the  
333 higher trimer yield (the formation of more favorable inter-protomer hydrogen bonds), although  
334 the cause of the two-peak thermogram remains unclear. Notably, GPΔmuc-SS2 was not  
335 structurally characterized in this study, because its incompatibility with foldon posed a challenge  
336 to crystallization.

### 337 **Display of EBOV GPΔmuc trimers on multilayered hyperstable nanoparticles**

338 VLPs are intrinsically immunogenic due to their large size and dense antigen display<sup>88</sup>.  
339 Compared with small antigens, VLPs are more suitable for direct uptake by dendritic cells (DC)  
340 and clustering of B-cell receptors (BCRs)<sup>88</sup>. Although recombinant VLPs can protect against  
341 EBOV challenge<sup>60-62</sup>, they may not be optimal vaccine solutions because of abnormal filament  
342 structures (up to 14 μm long) and manufacturing challenges<sup>63</sup>. Recently, self-assembling protein  
343 NPs were considered an alternative platform for developing VLP vaccines<sup>58,59</sup>. Previously, we  
344 displayed gp41-stabilized HIV-1 Env trimers on protein NPs of various sizes, which elicited  
345 robust NAb responses in mice and rabbits<sup>55,64</sup>. We also reported protein NPs that present an  
346 optimized HCV E2 core, which induced cross-genotype NAb responses in mice<sup>65</sup>. In this study,  
347 we displayed rationally redesigned GPΔmuc trimers on 24- and 60-meric protein NPs for in vivo  
348 assessment.

349 To explore this possibility, we modeled the EBOV GPΔmuc trimer on FR, E2p, and I3-  
350 01, resulting in GP-presenting NPs with diameters of 34.5 nm, 45.9 nm, and 49.2 nm,  
351 respectively (**Fig. 4a**). Superposition of GPΔmuc C-termini onto FR and E2p N-termini yielded



352 C $\alpha$  RMSDs of 7.0 Å and 5.5 Å, suggesting that GP $\Delta$ muc can be fused to FR with a short G<sub>4</sub>S  
353 linker and to E2p without a linker, respectively. However, the large spacing between the N  
354 termini of I3-01 subunits (~50.5 Å) requires a long linker to connect with the C-termini of a  
355 GP $\Delta$ muc trimer, which form a long, narrow stalk. Computational modeling suggested a 10-aa  
356 (G<sub>4</sub>S)<sub>2</sub> linker, which would result in a C $\alpha$  RMSD of 0.8 Å. Here, we first displayed two GP $\Delta$ muc  
357 trimers, wildtype and WL<sup>2</sup>P<sup>2</sup>, on FR, E2p, and I3-01 with a 5-aa linker, no linker, and a 10-aa  
358 linker, respectively. WL<sup>2</sup>P<sup>2</sup>, instead of WL<sup>2</sup>, was selected for NP display for its high trimer  
359 propensity and atomic structure. All six GP-NP fusion constructs were transiently expressed in  
360 100-ml ExpiCHO cells followed by mAb100 purification and SEC on a Superose 6 10/300 GL  
361 column (**Fig. 4b**). WL<sup>2</sup>P<sup>2</sup> outperformed wildtype GP $\Delta$ muc with greater NP yield and purity.  
362 Based on molecular weight (m.w.), the SEC peaks at ~15 ml correspond to the unassembled GP-  
363 NP species, suggesting an inherent instability for wildtype E2p and I3-01. The mAb100-purified  
364 GP $\Delta$ muc-WL<sup>2</sup>P<sup>2</sup>-presenting NP samples were further analyzed by negative stain EM (**Fig. 4c**),  
365 showing NPs mixed with impurities.

366 Previously, we demonstrated the use of a pan-reactive T cell epitope both as a linker and  
367 as a built-in T-cell help in an HIV-1 Env-I3-01 NP construct<sup>55</sup>, suggesting that additional  
368 structural and functional components can be incorporated into such large 60-meric NPs. Here,  
369 we sought to reengineer the E2p and I3-01 NPs by fusing a dimeric locking domain (LD) to the  
370 C-terminus of an NP subunit and then a T-helper epitope to the C terminus of an LD (**Fig. 4d**).  
371 We hypothesized that each LD dimer can stabilize a non-covalent NP-forming interface from  
372 inside, and the T-cell epitopes can form a hydrophobic core at the center of a fully assembled  
373 NP. To test this hypothesis, we manually inspected 815 homodimers in the PDB and selected  
374 nine LDs of 100 residues or less (**Fig. S6a**). Based on structural compatibility, LDs 1-7 were

375 tested for E2p, and five LDs (4-5 and 7-9) were tested for I3-01, all displaying GP $\Delta$ muc-WL<sup>2</sup>P<sup>2</sup>.  
376 Following transient expression in 100-ml ExpiCHO cells and mAb100 purification, 12 LD-  
377 containing NP samples were characterized by SEC (**Fig. 4e**). Notably, LD4 and LD7 increased  
378 the NP peak (UV<sub>280</sub> value) by 5- and 2.5-fold for E2p and I3-01, respectively, with substantially  
379 improved NP purity. The further incorporation of a T-cell epitope, PADRE, did not alter E2p  
380 properties, but negatively impacted I3-01 (**Fig. 4f**). An I3-01 variant, termed I3-01v9 (or 1VLW-  
381 v9 in the previous study<sup>55</sup>), was found to retain the NP yield and purity (**Fig. 4f**). Seven GP-NP  
382 samples, with three variants for each 60-meric NP, were further analyzed by BN-PAGE (**Fig.**  
383 **4g**). The FR and two E2p variants displayed a single high m.w. band corresponding to well-  
384 formed NPs, whereas the wildtype E2p and all three I3-01 samples showed additional low m.w.  
385 bands at 232-440 kD on the BN gel, indicating unassembled GP-NP species. Lastly, the  
386 mAb100/SEC-purified FR, E2p-LD4-PADRE (E2p-L4P), and I3-01v9-LD7-PADRE (I3-01v9-  
387 L7P) NPs that present the GP $\Delta$ muc-WL<sup>2</sup>P<sup>2</sup> trimer were analyzed by negative-stain EM (**Fig. 4h**).  
388 In addition to well-formed particles in all three samples, an array of GP $\Delta$ muc spikes could be  
389 clearly recognized on the surface of FR and E2p-L4P NPs.

390 Antigenicity of the three GP $\Delta$ muc-WL<sup>2</sup>P<sup>2</sup>-presenting NPs was assessed by ELISA using  
391 the same panel of 10 antibodies (**Fig. 4i**, **Fig. S6b** and **S6c**). Compared with the WL<sup>2</sup>P<sup>2</sup> trimer,  
392 the three NPs exhibited an epitope-specific binding pattern. Overall, multivalent display  
393 improved antibody recognition of the RBS and glycan cap in GP1, but reduced binding for  
394 bNAbs that target the base and IFL at the GP1/GP2 interface (e.g., CA45) and the GP2 stalk  
395 (e.g., BDBV223). This finding raised concerns that some conserved bNAb epitopes on the NP-  
396 displayed GP trimers may not be as accessible as on the soluble GP trimers. Two BLI  
397 experiments, with a total of three replicates for the highest antigen concentration, were

398 performed to further characterize the effect of multivalent display on the antibody recognition of  
399 various GP epitopes (**Fig. 4j, Fig. S6d-S6f**). Using comparable GP molar concentrations, the  
400 three NPs showed higher binding signals than the soluble trimer, with the most notable  
401 differences for NAbs mAb114 and mAb100 and a non-NAb c13C6. Based on these results, the  
402 FR, E2p-L4P, and I3-01v9-L7P NPs that present the redesigned GP $\Delta$ muc-WL<sup>2</sup>P<sup>2</sup> trimer were  
403 selected for animal immunization.

404 Our results indicate that EBOV GP can be displayed on self-assembling NPs through  
405 gene fusion, which requires the optimization of both GP and NP. In addition to GP $\Delta$ muc, GP<sub>ECTO</sub>  
406 was also tested but found unsuitable for NP display, as confirmed by the EM analysis of a  
407 GP<sub>ECTO</sub>-10GS-FR construct (**Fig. S6h**). The multilayered NP design exploits the inner space of  
408 large, cage-like NPs to increase their stability and deliver additional T-cell signals within a  
409 single-component system, representing a distinct strategy compared with the two-component NP  
410 design<sup>89,90</sup>.

#### 411 **Immunogenicity of EBOV GP trimers and NPs in BALB/c mice**

412 Following the protocol in our previous HIV-1 and HCV studies<sup>55,65</sup>, we immunized BALB/c  
413 mice to assess the immunogenicity of six representative constructs, including three EBOV  
414 GP/GP $\Delta$ muc trimers and three NPs (**Fig. 5a**). A GP<sub>ECTO</sub>-foldon trimer was included as a soluble  
415 version of the wildtype GP. Mice in the GP $\Delta$ muc-WL<sup>2</sup>P<sup>2</sup>-10GS-I3-01v9-L7P group were  
416 immunized with 20  $\mu$ g mAb100-purified protein instead of 50  $\mu$ g mAb100/SEC-purified protein  
417 due to the low yield of this NP. We first determined the GP-specific plasma antibody response in  
418 the ELISA using GP $\Delta$ muc-WL<sup>2</sup>P<sup>2</sup>-1TD0 as a probe, which utilized trimerization motif 1TD0  
419 (PDB ID: 1TD0) (**Fig. 5b, Fig. S7a-S7c**). The two GP $\Delta$ muc groups significantly ( $P < 0.0064$ )

420 outperformed the GP<sub>ECTO</sub> group throughout immunization (**Fig. 5b**, top), suggesting that the  
421 MLD can shield GP from antibody recognition. However, little difference was found between  
422 the two GP $\Delta$ muc groups, with WL<sup>2</sup>P<sup>2</sup> showing a slightly higher average EC<sub>50</sub> titer at w2 and w5  
423 that was reversed at later time points. Compared with the WL<sup>2</sup>P<sup>2</sup> trimer group, all NP groups  
424 showed lower EC<sub>50</sub> titers except for the E2p-L4P NP group, which yielded a modest *P* value of  
425 0.0381 at w2 (**Fig. 5b**, bottom). In our recent HCV study, two NPs elicited higher antibody titers  
426 than the soluble E2 core at w2 ( $P < 0.0001$ ) and w5 ( $P \leq 0.0223$ )<sup>65</sup>. The stark difference between  
427 these two studies suggests that antibody titers in response to such NP vaccines may be influenced  
428 by antigen size, structure, and epitope distribution. NP display may occlude antibody access to  
429 the base and stalk epitopes, which are targets of many bNAbs<sup>9</sup>. This result may also be attributed  
430 to other factors, such as dosage, as noted in our recent study<sup>65</sup>. The NP carrier accounts for 21-  
431 33% of the total mass of an NP vaccine, and the same antigen dose (50  $\mu$ g) has been used for all  
432 groups except the I3-01v9-L7P NP group. Thus, mice in the NP groups would receive less GP  
433 antigen than mice in the trimer-only group.

434 Before analyzing the mouse plasma NAb response, we validated the pseudoparticle (pp)  
435 neutralization assay<sup>12</sup> by testing 10 antibodies against two ebolavirus strains, EBOV-Makona and  
436 BDBV-Uganda, in 293 T and TZM-bl<sup>72</sup> cells (**Fig. 5c**, **Fig. S7d-S7f**). mAb114<sup>12</sup> and early  
437 EBOV NAbs KZ52<sup>76</sup>, c2G4, and c4G7<sup>10</sup> only neutralized EBOV-Makona, whereas mAb100<sup>12</sup>  
438 and four bNAbs, except BDBV223<sup>9</sup>, blocked both ebolavirus-pps. ADI-15946 was the most  
439 potent bNAb, as indicated by the half maximal inhibitory concentration (IC<sub>50</sub>). Non-NAb c13C6,  
440 which is part of the ZMapp cocktail<sup>10</sup> and binds the glycan cap<sup>45</sup>, enhanced ebolavirus-pp  
441 infection of both cell types. When tested against pseudoparticles bearing the murine leukemia  
442 virus Env, MLV-pps, all antibodies were non-reactive, except for c13C6, which enhanced MLV-

443 pp infection in 293 T cells (**Fig. S7g**). Overall, the enhancement observed for non-NAb c13C6 in  
444 the pseudovirus assays appeared to be consistent with ADE observed for human mAbs targeting  
445 the same epitope<sup>25</sup>.

446 We next performed neutralization assays using purified mouse immunoglobulin G (IgG)  
447 from the last time point, w11 (**Fig. 5d**, **Fig. S7h** and **S7i**). Two distinct types of antibody  
448 response were observed: NAb and non-NAb that enhanced ebolavirus-pp infection. Among the  
449 three GP trimers, GP<sub>ECTO</sub> elicited a moderate NAb response with signs of enhancement noted for  
450 three mice, whereas an increase in both types of antibody response was observed for GP $\Delta$ muc,  
451 suggesting that the removal of MLD exposes both NAb epitopes and the glycan cap, which is a  
452 main target for ADE-causing human mAbs<sup>25</sup>. The stalk/HR1<sub>C</sub> mutation WL<sup>2</sup>P<sup>2</sup> appeared to have  
453 largely reversed the enhancement caused by MLD removal. Among the three NPs, E2p-L4P  
454 elicited primarily NAb responses that blocked both ebolavirus-pps, whereas enhanced  
455 pseudoviral infection was observed for one mouse in the FR group and for all mice in the I3-  
456 01v9-L7P group. Because only non-NAb c13C6 and not any of the (b)NAbs reacted with MLV-  
457 pps (**Fig. S7g**), here we utilized the MLV-pp assay to gauge glycan cap-directed non-NAb  
458 responses induced by different vaccine constructs (**Fig. S7j**). Indeed, the patterns of enhanced  
459 MLV-pp infection correlated nicely with the patterns of enhanced ebolavirus-pp infection (**Fig.**  
460 **S7h-S7j**). In the MLV-pp assay, E2p-L4P NP induced a minimum enhancement-causing non-  
461 NAb response at a similar level to GP<sub>ECTO</sub>, in which MLD shields the glycan cap and other GP  
462 epitopes from the humoral response.

463 Our mouse study thus revealed some salient features of the GP-specific antibody  
464 response in the context of various GP forms and NP carriers. The c13C6-like non-NAbs that bind  
465 the glycan cap and cross-react with small secreted GP (ssGP)<sup>45</sup> need to be minimized in vaccine

466 design. The high level of enhancement-causing non-NAb responses observed for GP $\Delta$ muc and  
467 I3-01v9-L7P may be explained by less trimeric GP and unassembled GP-NP species,  
468 respectively. Nonetheless, a multilayered E2p NP displaying 20 GP $\Delta$ muc trimers elicited a  
469 robust bNAb response.

#### 470 **Immunogenicity of EBOV GP trimers and NPs in rabbits**

471 Following a similar protocol, we assessed two GP $\Delta$ muc trimers, wildtype and WL<sup>2</sup>P<sup>2</sup>, and three  
472 NPs presenting the WL<sup>2</sup>P<sup>2</sup> trimer in rabbits (**Fig. 5e**). Rabbit sera collected at six timepoints  
473 during immunization were analyzed by ELISA using the same trimer probe (**Fig. 5f, Fig. S8a**  
474 and **S8b**). Notably, rabbits in the I3-01v9-L7P NP group were immunized with 20  $\mu$ g of  
475 mAb100/SEC-purified material to reduce the enhancement-causing non-NAbs. Between the two  
476 trimer groups, WL<sup>2</sup>P<sup>2</sup> showed higher average EC<sub>50</sub> titers for all time points except w11, with a  
477 modest *P* value of 0.0229 at w5. Among the three NP groups, the I3-01v9 and FR groups yielded  
478 the highest and lowest EC<sub>50</sub> titers, respectively, throughout immunization. A significant  
479 difference was found between the I3-01v9-L7P and E2p-L4P groups at w8, w11, and w13, with  
480 *P* values in the range of 0.0021 to 0.0053. Compared with the GP $\Delta$ muc-WL<sup>2</sup>P<sup>2</sup> group, the I3-  
481 01v9-L7P NP group showed higher EC<sub>50</sub> titers at all six time points, with significant *P* values at  
482 w8, w11, and w13. In contrast, the FR and E2p-L4P groups yielded lower EC<sub>50</sub> titers than the  
483 GP $\Delta$ muc-WL<sup>2</sup>P<sup>2</sup> group at w2 and w5, but this pattern was reversed at w8 and w11 with modest *P*  
484 values at w8. However, these two NP groups ended with lower EC<sub>50</sub> titers than the trimer group  
485 at the last time point, w13.

486 We then performed ebolavirus-pp and MLV-pp assays using purified rabbit IgG from  
487 w11 (**Fig. 5g, Fig. S8c**). At this time point, all vaccine groups showed NAb responses with no

488 sign of enhanced pseudovirus infection, in contrast to the pattern of mixed antibody responses in  
489 mice (**Fig. 5d**). Notably, the I3-01v9-L7P NP group yielded higher average IC<sub>50</sub> titers than the  
490 other groups, 211.3 µg/ml and 11.72 µg/ml for EBOV-Makona and BDBV-Uganda,  
491 respectively, supporting the notion that unassembled GP-NP species and not the I3-01v9 NP  
492 carrier were responsible for eliciting enhancement-causing non-NABs in mice. All vaccine  
493 groups showed no sign of enhanced MLV-pp infection at w11 (**Fig. S8c**). Therefore,  
494 enhancement-causing non-NABs appeared to be absent in rabbit plasma toward the end of  
495 immunization. We next analyzed rabbit IgG from earlier time points day 0 (Pre), w2, w5, and w8  
496 (**Fig. S8d-S8g**), which revealed a unique temporal pattern of an increasing NAb response tailing  
497 a transient enhancement-causing non-NAB response. Specifically, enhanced Makona-pp  
498 infection was observed for the two trimer groups, FR group, and two multilayered NP groups at  
499 w2, w5, and w8, which then disappeared at w5, w8, and w11, respectively. Our longitudinal  
500 analysis suggests that vaccine-induced enhancement-causing non-NABs may shift epitopes and  
501 gain neutralizing activity through gene conversion, a mechanism employed by the rabbit immune  
502 system to rapidly develop functional antibodies<sup>91</sup>.

### 503 **B cell response profiles associated with EBOV GP trimers and NPs**

504 Previously, we combined antigen-specific B cell sorting and NGS to obtain a quantitative  
505 readout of the B-cell response induced by an HCV E2 core and its E2p NP<sup>65</sup>. A more diverse  
506 usage of heavy-chain variable genes (V<sub>H</sub>), a higher degree of V<sub>H</sub> mutations, and a broader range  
507 of heavy chain complementarity determining region 3 (HCDR3) length were observed for E2p<sup>65</sup>.  
508 In this study, we applied the same strategy to obtain GP-specific B cell profiles (**Fig. 6a**). Using  
509 an Avi-tagged GPΔmuc-WL<sup>2</sup>P<sup>2</sup>-1TD0 probe (**Fig. S9a**), we sorted GP-specific splenic B cells  
510 from 25 mice (**Fig. S9b**), which were sequenced on Ion GeneStudio S5. The NGS data were

511 analyzed using a mouse Antibodyomics pipeline<sup>92</sup> (**Fig. S9c**), with quantitative B cell profiles  
512 derived for different vaccine groups (**Fig. 6b, Fig. S9d-S9f**). We mainly focused on the  
513 GPΔmuc-WL<sup>2</sup>P<sup>2</sup>-foldon group and multilayered E2p group to compare B-cell responses to  
514 GPΔmuc in the trimeric versus NP forms (**Fig. 6b**). In terms of germline gene usage, similar  
515 patterns were observed for V<sub>H</sub> and V<sub>K</sub> genes (**Fig. 6b**, panels 1 and 2). The redesigned GPΔmuc  
516 trimer activated more V<sub>H</sub>/V<sub>L</sub> genes (9.4/9.4) than its NP form (6/7), with *P* values of 0.0163 and  
517 0.0076 for V<sub>H</sub> and V<sub>L</sub> genes, respectively. In contrast, the E2p NP decorated with 60 HCV E2  
518 cores activated more V<sub>H</sub> but not V<sub>L</sub> genes than the E2 core<sup>65</sup>. In terms of somatic hypermutation  
519 (SHM), no significant difference was found between the two groups (**Fig. 6b**, panel 3). However,  
520 we observed a visible shift in the SHM distribution for the E2p-L4P NP group, which showed  
521 higher germline V<sub>H</sub>/V<sub>K</sub> divergence (on average 6.4%/2.9%) than the trimer group (on average  
522 5.3%/2.6%). In the HCDR3 analysis, both average loop length and the RMS fluctuation (RMSF)  
523 of loop length were calculated (**Fig. 6b**, panel 4). Unlike in the HCV study, in which the RMSF  
524 of HCDR3 length yielded a *P* < 0.0001 between the E2 core and E2p NP groups<sup>65</sup>, no significant  
525 difference was found between the EBOV GPΔmuc and E2p NP groups. Overall, EBOV and  
526 HCV NPs exhibited distinct patterns of the B-cell response with respect to their individual  
527 antigens. Notably, there were no apparent correlations between B-cell profiles and vaccine-  
528 induced NAb and enhancement-causing non-NAb responses. Our results thus suggest that  
529 antigen size, structure, glycosylation, and epitope distribution, other than the NP carrier, may  
530 contribute critically to the NP vaccine-induced B-cell response.

## 531 **Discussion**

532 With a mortality rate of up to 90%, EBOV has caused significant humanitarian crises, calling for  
533 action across many sectors to develop effective interventions<sup>3</sup>. ZMapp<sup>10,11</sup> established the use of



534 NAbs as a treatment for patients with Ebola virus disease (EVD) and propelled a community-  
535 wide campaign to identify NAbs and bNAbs<sup>8,9,30,48</sup>. Several vaccine candidates have been tested  
536 in human trials<sup>63,93</sup>. Of these, rVSV-ZEBOV demonstrated an efficacy of 100% in an open-label,  
537 cluster-randomized ring trial<sup>16</sup> and was recently approved for human use. In a Phase 2 placebo-  
538 controlled trial of two vectored vaccines (including rVSV-ZEBOV), the antibody titer remained  
539 similar between the vaccine and placebo groups at one week post-vaccination and peaked after  
540 one month<sup>15</sup>. A recent analysis of human B cell responses to EBOV infection revealed hurdles in  
541 the GP-specific NAb response<sup>28,29</sup>. NAbs from vaccinated humans showed low levels of SHM<sup>94</sup>,  
542 suggesting a suboptimal B cell response elicited by an otherwise effective vectored vaccine<sup>95</sup>.  
543 The immune correlates of vaccine protection may not be universal and are likely determined by  
544 vaccine platforms, in addition to other factors<sup>96</sup>. As most EBOV vaccines are based on viral  
545 vectors<sup>63,93</sup>, protein subunit vaccines remain a promising approach to combat this deadly virus.

546       Here, we approached EBOV vaccine design with an antibody-based strategy focusing on  
547 GP optimization and multivalent display. We applied a similar strategy to develop HIV-1 and  
548 HCV vaccine candidates for in vitro and in vivo characterization<sup>55,56,64,65</sup>, which provided a  
549 context for interpreting the findings for EBOV. Previously, we identified an HR1<sub>N</sub> bend as the  
550 cause of HIV-1 Env metastability<sup>55,56</sup> and optimized an HCV E2 core<sup>65</sup>. EBOV GP belongs to  
551 the class-I fusion protein family<sup>53,54</sup> and is inherently metastable, as is HIV-1 Env. In this study,  
552 we probed the cause of EBOV GP metastability by testing various designs that target the HR2  
553 stalk, HR1<sub>C</sub> bend, and GP/GP interface (via inter-protomer disulfide bonds). The detailed  
554 characterization revealed a stabilizing effect of the W615L mutation and stalk extension, in  
555 addition to the unexpected sensitivity of HR1<sub>C</sub> (equivalent to HIV-1 HR1<sub>N</sub>) to specific proline  
556 mutations, which increased the trimer yield but caused complex unfolding behaviors in DSC.

557 Because this pattern was not reported for EBOV-Makona GP $\Delta$ muc that contained the T577P  
558 mutation<sup>84</sup>, GP metastability may thus be a strain-specific feature and warrant further  
559 investigation. Multivalent NP display proved to be challenging for EBOV GP because of its  
560 tendency toward dissociation. Although two-component NPs<sup>89,90</sup> and the SpyTag/SpyCatcher  
561 system<sup>97,98</sup> have been used to develop VLP-type vaccines, their inherent complexity in  
562 production, assembly, and purification, structural instability in vivo, and off-target response may  
563 dampen their potential as human vaccines. Here, we designed single-component, multilayered,  
564 and self-assembling protein NPs based on E2p and I3-01v9. Encoded within a single plasmid,  
565 such NP vaccines can be readily produced in good manufacturing practice (GMP)-compatible  
566 CHO cells followed by IAC and SEC purification, providing a simple and robust manufacturing  
567 process. Our immunogenicity studies in mice and rabbits revealed some salient features of GP  
568 that need to be addressed in EBOV vaccine development, regardless of the delivery platform.  
569 The choice of GP<sub>ECTO</sub> or GP $\Delta$ muc as a vaccine antigen may lead to antibody responses that  
570 target different GP epitopes. Antibody access to GP epitopes at the IFL, base, and HR2 stalk may  
571 differ in the trimeric and NP forms. In animal immunization, we observed an ADE-like non-NAb  
572 response, which may be associated with non-trimeric GP and unassembled GP-NP species.  
573 Antibody isolation, structural epitope mapping, and live EBOV neutralization assays may be  
574 required to determine the biological relevance of these findings. Furthermore, EBOV challenge  
575 in rodents may help determine protective NAb titers elicited by GP-presenting NPs with respect  
576 to recombinant VLPs<sup>60-62</sup>. Nonetheless, the E2p-L4P NP elicited a minimum non-NAb response  
577 in mice and the highly purified I3-01v9-L7P NP induced the strongest NAb response in rabbits,  
578 providing two promising constructs for further optimization and in vivo evaluation.

579           Having assessed various GP trimer and NP constructs, future investigation may be  
580 directed toward assessing other GP $\Delta$ muc designs, such as GP $\Delta$ muc-WL<sup>2</sup> and GP $\Delta$ muc-SS2, as  
581 well as their NPs, to further improve NAb responses and reduce glycan cap-directed non-NAb  
582 responses. The structural characterization of NAb and non-NAb isolated from immunized  
583 animals will provide critical insights into epitope recognition and guide future vaccine design.  
584 The strategy described in this study may find applications in vaccine development for other  
585 filoviruses.

## 586 **Methods**

### 587 **Design, expression, and purification of EBOV GP $\Delta$ muc and GP $\Delta$ muc-presenting NPs**

588 The glycoprotein sequence of Zaire EBOV (Mayinga-76 strain) with a T42A substitution was  
589 used to design all GP constructs in this study (UniProt ID: Q05320), with the primers  
590 summarized in **Table S1**. Logo analysis of EBOV and MARV GP sequences was performed  
591 using the WebLoGo v2.8 software to facilitate the design of the W615L mutation. Structural  
592 modeling was performed using the UCSF Chimera v1.13 software to facilitate the design of  
593 HR1<sub>C</sub>-proline and inter-protomer disulfide bond mutations. Wildtype and redesigned GP $\Delta$ muc  
594 constructs were transiently expressed in HEK293F cells (Thermo Fisher) for biochemical,  
595 biophysical, and antigenic analyses. Briefly, HEK293F cells were thawed and incubated with  
596 FreeStyle<sup>TM</sup> 293 Expression Medium (Life Technologies, CA) in a shaker incubator at 37 °C at  
597 135 rpm with 8% CO<sub>2</sub>. When the cells reached a density of  $2.0 \times 10^6$ /ml, expression medium  
598 was added to reduce cell density to  $1.0 \times 10^6$  ml<sup>-1</sup> for transfection with polyethyleneimine (PEI)  
599 (Polysciences, Inc). Next, 900  $\mu$ g of plasmid in 25 ml of Opti-MEM transfection medium (Life  
600 Technologies, CA) was mixed with 5 ml of PEI-MAX (1.0 mg/ml) in 25 ml of Opti-MEM. After  
601 30 min of incubation, the DNA-PEI-MAX complex was added to 1L 293 F cells. Culture

602 supernatants were harvested 5 days after transfection, clarified by centrifugation at 1126 ×g for  
603 22 min, and filtered using a 0.45 μm filter (Thermo Scientific). GPΔmuc proteins were extracted  
604 from the supernatants using an mAb114 antibody column or mAb100 antibody column. Bound  
605 proteins were eluted three times, each with 5 ml of 0.2 M glycine (pH 2.2) and neutralized with  
606 0.5 ml of Tris-Base (pH 9.0), and buffer-exchanged into phosphate-buffered saline (PBS; pH  
607 7.2). Proteins were further purified by SEC on a Superdex 200 Increase 10/300 GL column or  
608 HiLoad Superdex 200 16/600 column (GE Healthcare). GPΔmuc-presenting NPs were produced  
609 in ExpiCHO cells (Thermo Fisher). Briefly, ExpiCHO cells were thawed and incubated with  
610 ExpiCHO™ Expression Medium (Thermo Fisher) in a shaker incubator at 37 °C at 135 rpm with  
611 8% CO<sub>2</sub>. When the cells reached a density of 10×10<sup>6</sup> ml<sup>-1</sup>, ExpiCHO™ Expression Medium was  
612 added to reduce cell density to 6×10<sup>6</sup> ml<sup>-1</sup> for transfection. The ExpiFectamine™ CHO/plasmid  
613 DNA complexes were prepared for 100-ml transfection in ExpiCHO cells following the  
614 manufacturer's instructions. For these NP constructs, 100 μg of plasmid and 320 μl of  
615 ExpiFectamine™ CHO reagent were mixed in 7.7 ml of cold OptiPRO™ medium (Thermo  
616 Fisher). After the first feed on day 1, ExpiCHO cells were cultured in a shaker incubator at 33 °C  
617 at 115 rpm with 8% CO<sub>2</sub> according to the Max Titer protocol with an additional feed on day 5  
618 (Thermo Fisher). Culture supernatants were harvested 13 to 14 days after transfection, clarified  
619 by centrifugation at 3724 ×g for 25 min, and filtered using a 0.45 μm filter (Thermo Fisher). The  
620 mAb100 antibody column was used to extract nanoparticles from the supernatants, followed by  
621 SEC on a Superose 6 10/300 GL column. All SEC data were collected using the Unicorn 7.5  
622 software. For GPΔmuc and GPΔmuc-presenting NPs, the concentration was determined using  
623 UV<sub>280</sub> absorbance with theoretical extinction coefficients.

624

625 **Blue native polyacrylamide gel electrophoresis**

626 EBOV GP $\Delta$ muc and GP $\Delta$ muc-presenting NPs were analyzed by blue native polyacrylamide gel  
627 electrophoresis (BN-PAGE) and stained with Coomassie blue. The proteins were mixed with  
628 sample buffer and G250 loading dye and added to a 4-12% Bis-Tris NativePAGE<sup>TM</sup> gel (Life  
629 Technologies). BN-PAGE gels were run for 2 to 2.5 h at 150 V using NativePAGE<sup>TM</sup> running  
630 buffer (Life Technologies) according to the manufacturer's instructions. BN-PAGE images were  
631 collected using the Image Lab v6.0 software.

632

633 **Enzyme-linked immunosorbent assay**

634 Each well of a Costar<sup>TM</sup> 96-well assay plate (Corning) was first coated with 50  $\mu$ l of PBS  
635 containing 0.2  $\mu$ g of appropriate antigens. The plates were incubated overnight at 4 °C, and then  
636 washed five times with wash buffer containing PBS and 0.05% (v/v) Tween 20. Each well was  
637 then coated with 150  $\mu$ l of blocking buffer consisting of PBS, 40 mg ml<sup>-1</sup> blotting-grade blocker  
638 (Bio-Rad), and 5% (v/v) FBS. The plates were incubated with blocking buffer for 1 h at room  
639 temperature, and then washed five times with wash buffer. For antigen binding, antibodies were  
640 diluted in blocking buffer to a maximum concentration of 10  $\mu$ g ml<sup>-1</sup> followed by a 10-fold  
641 dilution series. For each antibody dilution, a total of 50  $\mu$ l volume was added to the appropriate  
642 wells. For animal sample analysis, plasma was diluted 10-fold for mouse and 50-fold for rabbit  
643 in blocking buffer and subjected to a 10-fold dilution series. For each sample dilution, a total of  
644 50  $\mu$ l volume was added to the wells. Each plate was incubated for 1 h at room temperature, and  
645 then washed five times with PBS containing 0.05% Tween 20. For antibody binding, a 1:5000  
646 dilution of goat anti-human IgG antibody (Jackson ImmunoResearch Laboratories, Inc), or for  
647 animal sample analysis, a 1:2000 dilution of horseradish peroxidase (HRP)-labeled goat anti-

648 mouse or anti-rabbit IgG antibody (Jackson ImmunoResearch Laboratories), was then made in  
649 wash buffer (PBS containing 0.05% Tween 20), with 50  $\mu$ l of this diluted secondary antibody  
650 added to each well. The plates were incubated with the secondary antibody for 1 h at room  
651 temperature, and then washed five times with PBS containing 0.05% Tween 20. Finally, the  
652 wells were developed with 50  $\mu$ l of TMB (Life Sciences) for 3-5 min before stopping the  
653 reaction with 50  $\mu$ l of 2 N sulfuric acid. The resulting readouts were measured on a plate reader  
654 (PerkinElmer) at a wavelength of 450 nm and collected using the PerkinElmer 2030 v4.0  
655 software. Notably, the week 2 plasma binding did not reach the plateau (or saturation) to allow  
656 for the accurate determination of EC<sub>50</sub> titers. Nonetheless, the EC<sub>50</sub> values were calculated in  
657 GraphPad Prism 8.4.3 and used as a quantitative measure of antibody titers to facilitate  
658 comparisons of different vaccine groups at week 2.

### 659 **Bio-layer interferometry**

660 The kinetics of GP $\Delta$ muc and GP $\Delta$ muc-presenting NP binding to a panel of 10 antibodies was  
661 measured using an Octet RED96 instrument (FortéBio, Pall Life Sciences). All assays were  
662 performed with agitation set to 1000 rpm in FortéBio 1 $\times$  kinetic buffer. The final volume for all  
663 solutions was 200  $\mu$ l per well. Assays were performed at 30 °C in solid black 96-well plates  
664 (Geiger Bio-One). Antibody (5  $\mu$ g ml<sup>-1</sup>) in 1 $\times$  kinetic buffer was loaded onto the surface of anti-  
665 human Fc Capture Biosensors (AHC) for GP $\Delta$ muc and of anti-human Fc Quantitation  
666 Biosensors (AHQ) for NPs for 300 s. A 60 s biosensor baseline step was applied prior to  
667 analyzing association of the antibody on the biosensor to the antigen in solution for 200 s. A two-  
668 fold concentration gradient of antigen, starting at 400 nM for GP $\Delta$ muc trimers, 25 nM for FR  
669 NPs, and 10 for E2p/I3-01v9 NPs, was used in a titration series of six. Dissociation of the  
670 interaction was followed for 300 s. The correction of baseline drift was performed by subtracting

671 the mean value of shifts recorded for a sensor loaded with antibody but not incubated with  
672 antigen and for a sensor without antibody but incubated with antigen. The Octet data were  
673 processed by FortéBio's data acquisition software v8.2. For GP $\Delta$ muc trimers, experimental data  
674 were fitted with the binding equations describing a 2:1 interaction to achieve the optimal fitting  
675 and determine the  $K_D$  values. For GP-presenting nanoparticles, two BLI experiments, one testing  
676 six antigen concentrations and the other testing the highest antigen concentration in duplicates,  
677 were performed. Binding signals at the highest antigen concentration (mean and standard  
678 deviation calculated from three replicates) were used to quantify the effect of multivalent NP  
679 display on GP-antibody interactions. Notably, the GP $\Delta$ muc-WL<sup>2</sup>P<sup>2</sup>-foldon trimer was also  
680 measured using AHQ biosensors to facilitate comparisons with three nanoparticles that present  
681 the GP $\Delta$ muc-WL<sup>2</sup>P<sup>2</sup> trimer multivalently.

## 682 **Differential scanning calorimetry**

683 Thermal melting curves of wildtype and redesigned GP $\Delta$ muc trimers were obtained with a  
684 MicroCal VP-Capillary calorimeter (Malvern). The purified GP $\Delta$ muc protein produced from  
685 293F cells was buffer exchanged into 1 $\times$ PBS and concentrated to 27–50  $\mu$ M before analysis by  
686 the instrument. Melting was probed at a scan rate of 90  $^{\circ}$ C $\cdot$ h<sup>-1</sup> from 25  $^{\circ}$ C to 110  $^{\circ}$ C. Data  
687 processing, including buffer correction, normalization, and baseline subtraction, was conducted  
688 using the standardized protocol from Origin 7.0 software.

## 689 **Protein production, crystallization, and data collection**

690 Two *Zaire* EBOV GP $\Delta$ muc-foldon constructs, one with the W615L mutation and the L extension  
691 (to residue 637) and the other with an additional T577P mutation, were expressed in HEK293S  
692 cells. The expressed GP was purified using an mAB100 antibody column followed by SEC on a

693 HiLoad Superdex 200 16/600 column (GE Healthcare). PBS (pH 7.2) was used as the gel  
694 filtration buffer during the purification process. The freshly purified GP protein was used for  
695 crystallization experiments using the sitting drop vapor diffusion method on our automated  
696 CrystalMation<sup>TM</sup> robotic system (Rigaku) at both 4 °C and 20 °C at The Scripps Research  
697 Institute (TSRI)<sup>99</sup>. EBOV GP was concentrated to ~10 mg/ml in 50 mM Tris-HCl, pH 8.0. The  
698 reservoir solution contained 12% (w/v) PEG 6000 and 0.1 M sodium citrate, pH 4.5. Diffraction-  
699 quality crystals were obtained after 2 weeks at 20 °C. The EBOV GP crystals were cryoprotected  
700 with 25% glycerol, mounted in a nylon loop and flash cooled in liquid nitrogen. Diffraction data  
701 were collected for crystals of GP $\Delta$ muc-WL<sup>2</sup>-foldon and GP $\Delta$ muc-WL<sup>2</sup>P<sup>2</sup>-foldon at Advanced  
702 Photon Source (APS) beamline 23ID-D and Stanford Synchrotron Radiation Light-source  
703 (SSRL) beamline 12-2, at 2.3 Å and 3.2 Å resolution, respectively. The diffraction data sets were  
704 processed with HKL-2000<sup>100</sup>. The crystal data were indexed in rhombohedral R32 and tetragonal  
705 P321 space groups with cell dimensions of GP $\Delta$ muc-WL<sup>2</sup>-foldon  $a = b = 114.58$  Å and  $c =$   
706  $312.38$  Å and GP $\Delta$ muc-WL<sup>2</sup>P<sup>2</sup>-foldon  $a = b = 114.06$  Å and  $c = 136.22$  Å, respectively (**Table**  
707 **S2**). The overall completeness of the two datasets was 96.4% and 99.9%.

## 708 **Structure determination and refinement**

709 The structures of EBOV GP were determined by molecular replacement (MR) using Phaser<sup>101</sup>  
710 from the CCP4i suite<sup>102</sup> with the coordinates of *Zaire* Ebola GP (PDB ID: 5JQ3) and the  
711 program MOLREP<sup>103</sup>. The polypeptide chains were manually adjusted into electron density  
712 using Coot<sup>104</sup>, refined with Refmac 5.8<sup>105</sup>, and validated using MolProbity<sup>106</sup>. The final  $R_{\text{cryst}}$   
713 and  $R_{\text{free}}$  values for the refined structures are 19.6% and 22.9%, and 28.6% and 33.6%, for  
714 GP $\Delta$ muc-WL<sup>2</sup>-foldon and GP $\Delta$ muc-WL<sup>2</sup>P<sup>2</sup>-foldon, respectively. The data processing and



715 refinement statistics are compiled in **Table S2**. Structural images shown in Fig. 3 and  
716 Supplementary Figs. 3-5 were generated using the PyMOL v2.3.4 software.

### 717 **Electron microscopy (EM) assessment of nanoparticle constructs**

718 The initial EM analysis of EBOV GPΔMuc NPs was conducted at the Core Microscopy Facility  
719 at The Scripps Research Institute. Briefly, nanoparticle samples were prepared at a concentration  
720 of 0.01 mg/ml. Carbon-coated copper grids (400 mesh) were glow-discharged, and 8 μl of each  
721 sample was adsorbed for 2 min. Excess sample was wicked away and grids were negatively  
722 stained with 2% uranyl formate for 2 min. Excess stain was wicked away, and the grids were  
723 allowed to dry. Samples were analyzed at 80 kV with a Talos L120C transmission electron  
724 microscope (Thermo Fisher), and images were acquired with a CETA 16M CMOS camera.  
725 Further EM analysis was conducted at the Hazen facility at The Scripps Research Institute.  
726 Nanoparticle samples were diluted to ~0.02 mg/ml and added onto carbon-coated copper 400  
727 mesh grids (Electron Microscopy Sciences) that had been plasma cleaned for 10 s with Ar/O<sub>2</sub>.  
728 After blotting to remove excess sample, grids were stained with 3 μl of 2% (w/v) uranyl formate  
729 for 60 s and blotted again to remove excess stain. Negative stain images were collected on a 120  
730 KeV Tecnai Spirit equipped with an Eagle 4K charge-coupled device (CCD) camera (FEI).  
731 Micrographs were collected using Legikon<sup>107</sup> and processed using cryoSPARC v2<sup>108</sup>.  
732 Micrographs were CTF corrected, and particles were picked manually and extracted for two-  
733 dimensional classification.

### 734 **Animal immunization and sample collection**

735 Similar immunization protocols were reported in our previous HIV-1 and HCV studies<sup>55,65</sup>.  
736 Briefly, the Institutional Animal Care and Use Committee (IACUC) guidelines were followed  
737 with animal subjects tested in the immunization study. Six-to-eight-week-old female BALB/c

738 mice were purchased from The Jackson Laboratory and housed in ventilated cages in  
739 environmentally controlled rooms at The Scripps Research Institute, in compliance with an  
740 approved IACUC protocol and AAALAC (Association for Assessment and Accreditation of  
741 Laboratory Animal Care) international guidelines. The vivarium was maintained at 22 °C with a  
742 13-hour light/11-hour dark cycle (lights on at 6:00 am and off at 7:00 pm) and 40-50% humidity,  
743 which might be reduced to 30%-40% during the winter. The mice were immunized at weeks 0, 3,  
744 6, and 9 with 200 µl of antigen/adjuvant mix containing 50 µg of vaccine antigen and 100 µl of  
745 adjuvant, AddaVax or Adju-Phos (InvivoGen), via the intraperitoneal (i.p.) route. Of note, 20 µg  
746 instead of 50 µg of mAb100-purified I3-01v9 protein was used in mouse immunization due to its  
747 low yield. Blood was collected two weeks after each immunization. All bleeds were performed  
748 through the retro-orbital sinus using heparinized capillary tubes into EDTA-coated tubes.  
749 Samples were diluted with an equal volume of PBS and then overlaid on 4.5 ml of Ficoll in a 15  
750 ml SepMate™ tube (STEMCELL Technologies) and spun at 300 ×g for 10 min at 20 °C to  
751 separate plasma and cells. The plasma was heat inactivated at 56 °C for 30 min, spun at 300 ×g  
752 for 10 min, and sterile filtered. The cells were washed once in PBS and then resuspended in 1 ml  
753 of ACK Red Blood Cell lysis buffer (Lonza). After washing with PBS, peripheral blood  
754 mononuclear cells (PBMCs) were resuspended in 2 ml of Bambanker Freezing Media  
755 (Lymphotec). Spleens were also harvested and ground against a 70-µm cell strainer (BD Falcon)  
756 to release splenocytes into a cell suspension. Splenocytes were centrifuged, washed in PBS,  
757 treated with 5 ml of ACK lysing buffer (Lonza), and frozen with 3ml of Bambanker freezing  
758 media. Purified mouse IgGs at w11 were obtained using a 0.2-ml protein G spin kit (Thermo  
759 Scientific) following the manufacturer's instructions and assessed in pseudovirus neutralization  
760 assays. Rabbit immunization and blood sampling were performed under a subcontract at ProSci

761 (San Diego, CA) under the IACUC protocol number APF-1A and related amendments  
762 (10/01/2018 through 10/01/2021). Five groups of female New Zealand White rabbits, four  
763 rabbits per group, were intramuscularly (i.m.) immunized with 50 µg of vaccine antigen  
764 formulated in 250 µl of adjuvant, AddaVax or Adju-Phos (InvivoGen), with a total volume of  
765 500 µl, at w0, w3, w6, and w9. Of note, 20 µg of mAb100/SEC-purified I3-01v9 NP was used  
766 for rabbit immunization. Blood samples, 20 ml each time, were collected from the auricular  
767 artery at day 0 (Pre), w2, w5, w8, and w11. More than 100 ml of blood was taken at w13, via  
768 cardiac puncture, for PBMC isolation. Plasma samples were heat inactivated for ELISA binding  
769 assays, and purified rabbit IgGs were assessed in pseudovirus neutralization assays.

#### 770 **Pseudovirus neutralization assay**

771 The ebolavirus pseudoparticle (ebolavirus-pp) neutralization assay<sup>12</sup> was performed to assess the  
772 neutralizing activity of previously reported mAbs and vaccine-induced antibody responses in  
773 mice and rabbits. Ebolavirus-pps were generated by the co-transfection of HEK293T cells with  
774 the HIV-1 pNL4-3.lucR-E- plasmid (NIH AIDS reagent program: <https://www.aidsreagent.org/>)  
775 and the expression plasmid encoding the GP gene of an EBOV Makona strain (GenBank  
776 accession no. KJ660346) or BDBV Uganda strain (GenBank accession no. KR063673) at a 4:1  
777 ratio by lipofectamine 3000 (Thermo Fisher). After 48-72 h, ebolavirus-pps were collected from  
778 the supernatant by centrifugation at 3724 ×g for 10 min, aliquoted, and stored at -80 °C until use.  
779 The mAbs at a starting concentration of 10 µg/ml, or purified IgGs at a starting concentration of  
780 300 µg/ml for mouse and 1000 µg/ml for rabbit, were mixed with the supernatant containing  
781 ebolavirus-pps and incubated for 1 h at 37°C in white solid-bottom 96-well plates (Corning).  
782 Based on recent studies on EBOV infectivity in various cell lines<sup>72,109</sup>, 293 T cells or TZM-bl  
783 cells were used for ebolavirus-pp neutralization assays. Briefly, HEK293T cells or TZM-bl cells

784 at  $1 \times 10^4$  were added to each well and the plate was incubated at 37 °C for 48 h. After  
785 incubation, overlying media was removed, and cells were lysed. The firefly luciferase signal  
786 from infected cells was determined using the Bright-Glo Luciferase Assay System (Promega)  
787 according to the manufacturer's instructions. Data were retrieved from a BioTek microplate  
788 reader with Gen 5 software. The average background luminescence from a series of uninfected  
789 wells was subtracted from each well, and neutralization curves were generated using GraphPad  
790 Prism 8.4.3, in which values from wells were compared against a well containing ebolavirus-pp  
791 only. The same HIV-1 vectors pseudotyped with the murine leukemia virus (MLV) Env gene,  
792 termed MLV-pps, were produced in 293 T cells and included in the neutralization assays as a  
793 negative control. Because non-NAb c13C6 exhibited enhanced MLV-pp infection, the MLV-pp  
794 assay was also used to detect and quantify the glycan cap-directed non-NAb response in  
795 immunized animal samples.

#### 796 **Bulk sorting of EBOV GP $\Delta$ muc-specific mouse splenic B cells**

797 Spleens were harvested from mice 15 days after the last immunization, and the cell suspension  
798 was prepared. Dead cells were excluded by staining with the Fixable Aqua Dead Cell Stain kit  
799 (Thermo Fisher L34957). Fc $\gamma$ III (CD16) and Fc $\gamma$ II (CD32) receptors were blocked by adding 20  
800  $\mu$ l of 2.4G2 mAb (BD Pharmigen, catalog no. N553142). The cells were then incubated with 10  
801  $\mu$ g/ml of a biotinylated GP $\Delta$ muc-WL<sup>2</sup>P<sup>2</sup>-1TD0-Avi trimer. Briefly, the probe was generated by  
802 biotinylation of the GP $\Delta$ muc-WL<sup>2</sup>P<sup>2</sup>-1TD0-Avi trimer using biotin ligase BirA according to the  
803 manufacturer's instructions (Avidity). Biotin excess was removed by SEC on a Superdex 200  
804 10/300 column (GE Healthcare). In the SEC profile, the Avi-tagged GP $\Delta$ muc trimer peak was  
805 centered at 10.0-11.0 ml, whereas a broader peak of biotin ligase was found at 20 ml. Cells and  
806 biotinylated proteins were incubated for 5 min at 4 °C, followed by the addition of 2.5  $\mu$ l of anti-

807 mouse IgG fluorescently labeled with FITC (Jackson ImmunoResearch catalog no. 115-095-071)  
808 and incubated for 15 min at 4 °C. Finally, 5 µl of premium-grade allophycocyanin (APC)-labeled  
809 streptavidin was added to cells and incubated for 15 min at 4 °C. In each step, the cells were  
810 washed with PBS and the sorting buffer was 0.5 ml of FACS buffer. FITC<sup>+</sup> APC<sup>+</sup> GPΔmuc-  
811 specific B cells were sorted using MoFloAstrios into one well of a 96-well plate with 20µl of  
812 lysis buffer. Gating strategies used in antigen-specific mouse B cell sorting are exemplified by  
813 the flow-chart in **Fig. S9b**. Briefly, antigen-specific mouse splenic B cells were isolated by  
814 gating on single cells that were live/dead marker negative, mouse IgG positive, and biotinylated  
815 EBOV GP positive. Flow cytometry data were collected using the Summit v6.3 software.

#### 816 **NGS and bioinformatics analysis of mouse B cells**

817 Previously, a 5'-rapid amplification of cDNA ends (RACE)-polymerase chain reaction (PCR)  
818 protocol was reported for the unbiased sequencing of mouse B-cell repertoires<sup>65</sup>. In this study,  
819 this protocol was applied to analyze bulk-sorted, GP-specific mouse splenic B cells. Briefly, 5'-  
820 RACE cDNA was obtained from bulk-sorted splenic B cells of each mouse with the SMART-  
821 Seq v4 Ultra Low Input RNA Kit for Sequencing (TaKaRa). The IgG PCRs were set up with  
822 Platinum *Taq* High-Fidelity DNA Polymerase (Life Technologies) in a total volume of 50 µl,  
823 with 5 µl of cDNA as the template, 1 µl of 5'-RACE primer, and 1 µl of 10 µM reverse primer.  
824 The 5'-RACE primer contained a PGM/S5 P1 adaptor, while the reverse primer contained a  
825 PGM/S5 A adaptor. We adapted the mouse 3'-C<sub>γ</sub>1-3/3'-C<sub>μ</sub> inner primers and 3'-mC<sub>κ</sub> outer  
826 primer as reverse primers for the 5'-RACE PCR processing of heavy and light (κ) chains (**Table**  
827 **S1**). A total of 25 cycles of PCR was performed and the expected PCR products (500-600 bp)  
828 were gel purified (Qiagen). NGS was performed on the Ion S5 GeneStudio system. Briefly,  
829 heavy and light (κ) chain libraries from the same mouse were quantitated using a Qubit® 2.0

830 Fluorometer with Qubit® dsDNA HS Assay Kit and then mixed at a 3:1 ratio before being  
831 pooled with antibody libraries of other mice at an equal ratio for sequencing. Template  
832 preparation and (Ion 530) chip loading were performed on Ion Chef using the Ion 520/530 Ext  
833 Kit, followed by sequencing on the Ion S5 system with default settings. The mouse  
834 Antibodyomics pipeline<sup>65</sup> was used to process raw NGS data and derive quantitative profiles for  
835 germline gene usage, degree of SHM, and H/KCDR3 loop length.

### 836 **Statistics and Reproducibility**

837 SEC was performed for all GP/NP constructs at least once for *in vitro* characterization and  
838 multiple times during protein production for animal studies. Representative SEC profiles were  
839 selected for comparison. BN-PAGE was performed for all GP/NP constructs at least once during  
840 screening, with selected constructs run on the same gel to facilitate visual comparison. DSC was  
841 performed up to three times to validate key thermal parameters and thermographs. Negative-stain  
842 EM was performed routinely for all NP constructs during *in vitro* characterization and protein  
843 production for animal studies. All ELISA binding assays were performed in duplicates. Due to  
844 the limited availability of purified mouse IgG samples, ebolavirus-pp neutralization assays were  
845 performed without duplicates. For the panel of 10 representative antibodies and purified rabbit  
846 IgG samples, ebolavirus-pp neutralization assays were performed in duplicates. An unpaired  
847 two-tailed *t* test was performed in GraphPad Prism 8.4.3 to determine *P* values in the analysis of  
848 binding antibody response and mouse B-cell repertoires. The level of statistical significance is  
849 indicated as: \*, *P* < 0.05; \*\*, *P* < 0.01; \*\*\*, *P* < 0.001; \*\*\*\*, *p* < 0.0001.

### 850 **Data Availability**

851 The X-ray crystallographic coordinates for two rationally redesigned GPΔmuc structures in this  
852 study have been deposited in the Protein Data Bank (PDB, <https://www.rcsb.org/>), under

853 accession codes 7JPI (<http://doi.org/10.2210/pdb7jpi/pdb>) and 7JPH  
854 (<http://doi.org/10.2210/pdb7jph/pdb>). The mouse B-cell NGS datasets have been deposited in the  
855 NIH Sequence Read Archive (SRA, <https://www.ncbi.nlm.nih.gov/sra>), with the identifier  
856 PRJNA718964 (<https://www.ncbi.nlm.nih.gov/bioproject/PRJNA718964/>). The authors declare  
857 that the data supporting the findings of this study are available within the article and its  
858 Supplementary Information files. Source data are provided with this paper.

## 859 References

- 860 1 Kuhn, J. H. *et al.* Virus nomenclature below the species level: a standardized  
861 nomenclature for filovirus strains and variants rescued from cDNA. *Arch. Virol.* **159**,  
862 1229-1237, doi:10.1007/s00705-013-1877-2 (2014).
- 863 2 Paessler, S. & Walker, D. H. Pathogenesis of the viral hemorrhagic fevers. *Annu. Rev.*  
864 *Pathol.* **8**, 411-440, doi:10.1146/annurev-pathol-020712-164041 (2013).
- 865 3 Malvy, D., McElroy, A. K., de Clerck, H., Gunther, S. & van Griensven, J. Ebola virus  
866 disease. *Lancet* **393**, 936-948, doi:10.1016/s0140-6736(18)33132-5 (2019).
- 867 4 Ebola outbreak 2014-2016 (<https://www.who.int/csr/disease/ebola/en/>).
- 868 5 Ebola situation reports: Democratic Republic of the Congo  
869 (<https://www.who.int/ebola/situation-reports/drc-2018/en/>).
- 870 6 Cardile, A. P., Downey, L. G., Wiseman, P. D., Warren, T. K. & Bavari, S. Antiviral  
871 therapeutics for the treatment of Ebola virus infection. *Curr. Opin. Pharmacol.* **30**, 138-  
872 143, doi:10.1016/j.coph.2016.08.016 (2016).
- 873 7 Cardile, A. P., Warren, T. K., Martins, K. A., Reisler, R. B. & Bavari, S. Will There Be a  
874 Cure for Ebola? *Annu. Rev. Pharmacol. Toxicol.* **57**, 329-348, doi:10.1146/annurev-  
875 pharmtox-010716-105055 (2017).
- 876 8 Mire, C. E. & Geisbert, T. W. Neutralizing the threat: pan-ebolavirus antibodies close the  
877 loop. *Trends Mol. Med.* **23**, 669-671, doi:10.1016/j.molmed.2017.06.008 (2017).
- 878 9 King, L. B., Milligan, J. C., West, B. R., Schendel, S. L. & Sapphire, E. O. Achieving  
879 cross-reactivity with pan-ebolavirus antibodies. *Curr. Opin. Virol.* **34**, 140-148,  
880 doi:10.1016/j.coviro.2019.01.003 (2019).
- 881 10 Qiu, X. G. *et al.* Reversion of advanced Ebola virus disease in nonhuman primates with  
882 ZMapp. *Nature* **514**, 47-53, doi:10.1038/nature13777 (2014).
- 883 11 Davey, R. T. *et al.* A randomized, controlled trial of ZMapp for Ebola virus infection. *N.*  
884 *Engl. J. Med.* **375**, 1448-1456, doi:10.1056/NEJMoa1604330 (2016).
- 885 12 Corti, D. *et al.* Protective monotherapy against lethal Ebola virus infection by a potently  
886 neutralizing antibody. *Science* **351**, 1339-1342, doi:10.1126/science.aad5224 (2016).
- 887 13 Gaudinski, M. R. *et al.* Safety, tolerability, pharmacokinetics, and immunogenicity of the  
888 therapeutic monoclonal antibody mAb114 targeting Ebola virus glycoprotein (VRC 608):  
889 an open-label phase 1 study. *Lancet* **393**, 889-898, doi:10.1016/s0140-6736(19)30036-4  
890 (2019).
- 891 14 Zhu, F. C. *et al.* Safety and immunogenicity of a recombinant adenovirus type-5 vector-  
892 based Ebola vaccine in healthy adults in Sierra Leone: a single-centre, randomised,  
893 double-blind, placebo-controlled, phase 2 trial. *Lancet* **389**, 621-628, doi:10.1016/s0140-  
894 6736(16)32617-4 (2017).
- 895 15 Kennedy, S. B. *et al.* Phase 2 placebo-controlled trial of two vaccines to prevent Ebola in  
896 Liberia. *N. Engl. J. Med.* **377**, 1438-1447, doi:10.1056/NEJMoa1614067 (2017).
- 897 16 Henao-Restrepo, A. M. *et al.* Efficacy and effectiveness of an rVSV-vectored vaccine in  
898 preventing Ebola virus disease: final results from the Guinea ring vaccination, open-label,  
899 cluster-randomised trial (Ebola Ça Suffit!). *Lancet* **389**, 505-518, doi:10.1016/s0140-  
900 6736(16)32621-6 (2017).
- 901 17 Sarwar, U. N. *et al.* Safety and immunogenicity of DNA vaccines encoding ebolavirus  
902 and marburgvirus wild-type glycoproteins in a phase I clinical trial. *J. Infect. Dis.* **211**,  
903 549-557, doi:10.1093/infdis/jiu511 (2015).



- 904 18 Jones, S. M. *et al.* Live attenuated recombinant vaccine protects nonhuman primates  
905 against Ebola and Marburg viruses. *Nat. Med.* **11**, 786-790, doi:10.1038/nm1258 (2005).
- 906 19 Qiu, X. G. *et al.* Mucosal immunization of cynomolgus macaques with the VSV delta  
907 G/ZEBOVGP vaccine stimulates strong Ebola GP-specific immune responses. *PLoS One*  
908 **4**, e5547, doi:10.1371/journal.pone.0005547 (2009).
- 909 20 Geisbert, T. W. *et al.* Single-injection vaccine protects nonhuman primates against  
910 infection with Marburg virus and three species of Ebola virus. *J. Virol.* **83**, 7296-7304,  
911 doi:10.1128/jvi.00561-09 (2009).
- 912 21 Geisbert, T. W. *et al.* Vesicular stomatitis virus-based Ebola vaccine is well-tolerated and  
913 protects immunocompromised nonhuman primates. *PLoS Pathog.* **4**, e1000225,  
914 doi:10.1371/journal.ppat.1000225 (2008).
- 915 22 Lévy, Y. *et al.* Prevention of Ebola virus disease through vaccination: where we are in  
916 2018. *Lancet* **392**, 787-790, doi:10.1016/S0140-6736(18)31710-0 (2018).
- 917 23 Marzi, A. *et al.* Antibodies are necessary for rVSV/ZEBOV-GP-mediated protection  
918 against lethal Ebola virus challenge in nonhuman primates. *Proc. Natl. Acad. Sci. U. S. A.*  
919 **110**, 1893-1898, doi:10.1073/pnas.1209591110 (2013).
- 920 24 McWilliams, I. L. *et al.* Pseudovirus rVSV delta G-ZEBOV-GP infects neurons in retina  
921 and CNS, causing apoptosis and neurodegeneration in neonatal mice. *Cell Rep.* **26**, 1718-  
922 1726.e1714, doi:10.1016/j.celrep.2019.01.069 (2019).
- 923 25 Kuzmina, N. A. *et al.* Antibody-dependent enhancement of Ebola virus infection by  
924 human antibodies isolated from survivors. *Cell Rep.* **24**, 1802-1815.e1805,  
925 doi:10.1016/j.celrep.2018.07.035 (2018).
- 926 26 Lee, J. E. & Saphire, E. O. Ebolavirus glycoprotein structure and mechanism of entry.  
927 *Future Virol.* **4**, 621-635, doi:10.2217/fvl.09.56 (2009).
- 928 27 McElroy, A. K. *et al.* Human Ebola virus infection results in substantial immune  
929 activation. *Proc. Natl. Acad. Sci. U. S. A.* **112**, 4719-4724, doi:10.1073/pnas.1502619112  
930 (2015).
- 931 28 Davis, C. W. *et al.* Longitudinal analysis of the human B cell response to Ebola virus  
932 infection. *Cell* **177**, 1566-1582.e1517, doi:10.1016/j.cell.2019.04.036 (2019).
- 933 29 Williamson, L. E. *et al.* Early human B cell response to Ebola virus in four US survivors  
934 of infection. *J. Virol.* **93**, e01439-01418, doi:10.1128/jvi.01439-18 (2019).
- 935 30 Saphire, E. O. & Aman, M. J. Feverish quest for Ebola immunotherapy: straight or  
936 cocktail? *Trends Microbiol.* **24**, 684-686, doi:10.1016/j.tim.2016.05.008 (2016).
- 937 31 Flyak, A. I. *et al.* Mechanism of human antibody-mediated neutralization of Marburg  
938 virus. *Cell* **160**, 893-903, doi:10.1016/j.cell.2015.01.031 (2015).
- 939 32 King, L. B. *et al.* The marburgvirus-neutralizing human monoclonal antibody MR191  
940 targets a conserved site to block virus receptor binding. *Cell Host Microbe* **23**, 101-  
941 109.e104, doi:10.1016/j.chom.2017.12.003 (2018).
- 942 33 Fusco, M. L. *et al.* Protective mAbs and cross-reactive mAbs raised by immunization  
943 with engineered Marburg virus GPs. *PLoS Pathog.* **11**, e1005016,  
944 doi:10.1371/journal.ppat.1005016 (2015).
- 945 34 Keck, Z. Y. *et al.* Macaque monoclonal antibodies targeting novel conserved epitopes  
946 within filovirus glycoprotein. *J. Virol.* **90**, 279-291, doi:10.1128/jvi.02172-15 (2016).
- 947 35 Howell, K. A. *et al.* Antibody treatment of Ebola and Sudan virus infection via a  
948 uniquely exposed epitope within the glycoprotein receptor-binding site. *Cell Rep.* **15**,  
949 1514-1526, doi:10.1016/j.celrep.2016.04.026 (2016).

- 950 36 Zhao, X. L. *et al.* Immunization-elicited broadly protective antibody reveals ebolavirus  
951 fusion loop as a site of vulnerability. *Cell* **169**, 891-904.e815,  
952 doi:10.1016/j.cell.2017.04.038 (2017).
- 953 37 Bornholdt, Z. A. *et al.* Isolation of potent neutralizing antibodies from a survivor of the  
954 2014 Ebola virus outbreak. *Science* **351**, 1078-1083, doi:10.1126/science.aad5788  
955 (2016).
- 956 38 Wec, A. Z. *et al.* Antibodies from a human survivor define sites of vulnerability for broad  
957 protection against ebolaviruses. *Cell* **169**, 878-890, doi:10.1016/j.cell.2017.04.037  
958 (2017).
- 959 39 Gilchuk, P. *et al.* Multifunctional pan-ebolavirus antibody recognizes a site of broad  
960 vulnerability on the ebolavirus glycoprotein. *Immunity* **49**, 363-374.e310,  
961 doi:10.1016/j.immuni.2018.06.018 (2018).
- 962 40 Lee, J. E. *et al.* Structure of the Ebola virus glycoprotein bound to an antibody from a  
963 human survivor. *Nature* **454**, 177-182, doi:10.1038/nature07082 (2008).
- 964 41 Dias, J. M. *et al.* A shared structural solution for neutralizing ebolaviruses. *Nat. Struct.*  
965 *Mol. Biol.* **18**, 1424-1427, doi:10.1038/nsmb.2150 (2011).
- 966 42 Misasi, J. *et al.* Structural and molecular basis for Ebola virus neutralization by protective  
967 human antibodies. *Science* **351**, 1343-1346, doi:10.1126/science.aad6117 (2016).
- 968 43 Bornholdt, Z. A. *et al.* Host-primed Ebola virus GP exposes a hydrophobic NPC1  
969 receptor-binding pocket, revealing a target for broadly neutralizing antibodies. *mBio* **7**,  
970 doi:10.1128/mBio.02154-15 (2016).
- 971 44 Murin, C. D. *et al.* Structures of protective antibodies reveal sites of vulnerability on  
972 Ebola virus. *Proc. Natl. Acad. Sci. U. S. A.* **111**, 17182-17187,  
973 doi:10.1073/pnas.1414164111 (2014).
- 974 45 Pallesen, J. *et al.* Structures of Ebola virus GP and sGP in complex with therapeutic  
975 antibodies. *Nat. Microbiol.* **1**, 16128, doi:10.1038/nmicrobiol.2016.128 (2016).
- 976 46 Flyak, A. I. *et al.* Cross-reactive and potent neutralizing antibody responses in human  
977 survivors of natural ebolavirus infection. *Cell* **164**, 392-405,  
978 doi:10.1016/j.cell.2015.12.022 (2016).
- 979 47 Gilchuk, P. *et al.* Analysis of a therapeutic antibody cocktail reveals determinants for  
980 cooperative and broad ebolavirus neutralization. *Immunity* **52**, 388-403.e312,  
981 doi:10.1016/j.immuni.2020.01.001 (2020).
- 982 48 Saphire, E. O. *et al.* Systematic analysis of monoclonal antibodies against Ebola virus GP  
983 defines features that contribute to protection. *Cell* **174**, 938-952.e913,  
984 doi:10.1016/j.cell.2018.07.033 (2018).
- 985 49 Walker, L. M. & Burton, D. R. Rational antibody-based HIV-1 vaccine design: current  
986 approaches and future directions. *Curr. Opin. Immunol.* **22**, 358-366,  
987 doi:10.1016/j.coi.2010.02.012 (2010).
- 988 50 Haynes, B. F. & Mascola, J. R. The quest for an antibody-based HIV vaccine. *Immunol.*  
989 *Rev.* **275**, 5-10, doi:10.1111/imr.12517 (2017).
- 990 51 Sanders, R. W. & Moore, J. P. Native-like Env trimers as a platform for HIV-1 vaccine  
991 design. *Immunol. Rev.* **275**, 161-182, doi:10.1111/imr.12481 (2017).
- 992 52 Ward, A. B. & Wilson, I. A. The HIV-1 envelope glycoprotein structure: nailing down a  
993 moving target. *Immunol. Rev.* **275**, 21-32, doi:10.1111/imr.12507 (2017).

- 994 53 White, J. M., Delos, S. E., Brecher, M. & Schornberg, K. Structures and mechanisms of  
995 viral membrane fusion proteins: Multiple variations on a common theme. *Crit. Rev.*  
996 *Biochem. Mol. Biol.* **43**, 189-219, doi:10.1080/10409230802058320 (2008).
- 997 54 Harrison, S. C. Viral membrane fusion. *Virology* **479**, 498-507,  
998 doi:10.1016/j.virol.2015.03.043 (2015).
- 999 55 He, L. *et al.* HIV-1 vaccine design through minimizing envelope metastability. *Sci. Adv.*  
1000 **4**, aau6769 (2018).
- 1001 56 Kong, L. *et al.* Uncleaved prefusion-optimized gp140 trimers derived from analysis of  
1002 HIV-1 envelope metastability. *Nat. Commun.* **7**, 12040, doi:10.1038/ncomms12040  
1003 (2016).
- 1004 57 Aldon, Y. *et al.* Rational design of DNA-expressed stabilized native-like HIV-1 envelope  
1005 trimers. *Cell Rep.* **24**, 3324-3338.e3325, doi:10.1016/j.celrep.2018.08.051 (2018).
- 1006 58 Brouwer, P. J. M. & Sanders, R. W. Presentation of HIV-1 envelope glycoprotein trimers  
1007 on diverse nanoparticle platforms. *Curr. Opin. HIV AIDS* **14**, 302-308,  
1008 doi:10.1097/coh.0000000000000549 (2019).
- 1009 59 Kulp, D. W. & Xu, Z. Protein engineering and particulate display of B-cell epitopes to  
1010 facilitate development of novel vaccines. *Curr. Opin. Immunol.* **59**, 49-56, doi:doi:  
1011 10.1016/j.coi.2019.03.003 (2019).
- 1012 60 Warfield, K. L. *et al.* Ebola virus-like particle-based vaccine protects nonhuman primates  
1013 against lethal Ebola virus challenge. *J. Infect. Dis.* **196**, S430-S437, doi:10.1086/520583  
1014 (2007).
- 1015 61 Swenson, D. L. *et al.* Virus-like particles exhibit potential as a pan-filovirus vaccine for  
1016 both Ebola and Marburg viral infections. *Vaccine* **23**, 3033-3042,  
1017 doi:10.1016/j.vaccine.2004.11.070 (2005).
- 1018 62 Warfield, K. L. *et al.* Ebola virus-like particles protect from lethal Ebola virus infection.  
1019 *Proc. Natl. Acad. Sci. U. S. A.* **100**, 15889-15894, doi:10.1073/pnas.2237038100 (2003).
- 1020 63 Feldmann, H., Feldmann, F. & Marzi, A. Ebola: Lessons on vaccine development. *Annu.*  
1021 *Rev. Microbiol.* **72**, 423-446, doi:10.1146/annurev-micro-090817-062414 (2018).
- 1022 64 He, L. *et al.* Presenting native-like trimeric HIV-1 antigens with self-assembling  
1023 nanoparticles. *Nat. Commun.* **7**, 12041, doi:10.1038/ncomms12041 (2016).
- 1024 65 He, L. L. *et al.* Proof of concept for rational design of hepatitis C virus E2 core  
1025 nanoparticle vaccines. *Sci. Adv.* **6**, eaaz6225, doi:10.1126/sciadv.aaz6225 (2020).
- 1026 66 Zhao, Y. G. *et al.* Toremfifene interacts with and destabilizes the Ebola virus  
1027 glycoprotein. *Nature* **535**, 169-172, doi:10.1038/nature18615 (2016).
- 1028 67 Pugach, P. *et al.* A native-like SOSIP.664 trimer based on an HIV-1 subtype B env gene.  
1029 *J. Virol.* **89**, 3380-3395, doi:10.1128/jvi.03473-14 (2015).
- 1030 68 Sanders, R. W. *et al.* A next-generation cleaved, soluble HIV-1 Env trimer, BG505  
1031 SOSIP.664 gp140, expresses multiple epitopes for broadly neutralizing but not non-  
1032 neutralizing antibodies. *PLoS Pathog.* **9**, e1003618, doi:10.1371/journal.ppat.1003618  
1033 (2013).
- 1034 69 Slieden, K. *et al.* Presenting native-like HIV-1 envelope trimers on ferritin nanoparticles  
1035 improves their immunogenicity. *Retrovirology* **12**, 82, doi:10.1186/s12977-015-0210-4  
1036 (2015).
- 1037 70 Lyumkis, D. *et al.* Cryo-EM structure of a fully glycosylated soluble cleaved HIV-1  
1038 envelope trimer. *Science* **342**, 1484-1490, doi:10.1126/science.1245627 (2013).

- 1039 71 Julien, J.-P. *et al.* Crystal structure of a soluble cleaved HIV-1 envelope trimer. *Science*  
1040 **342**, 1477-1483, doi:10.1126/science.1245625 (2013).
- 1041 72 Shaikh, F. *et al.* Structure-based in silico screening identifies a potent ebolavirus inhibitor  
1042 from a traditional Chinese medicine library. *J. Med. Chem.* **62**, 2928-2937,  
1043 doi:10.1021/acs.jmedchem.8b01328 (2019).
- 1044 73 Ren, J. S., Zhao, Y. G., Fry, E. E. & Stuart, D. I. Target identification and mode of action  
1045 of four chemically divergent drugs against ebolavirus infection. *J. Med. Chem.* **61**, 724-  
1046 733, doi:10.1021/acs.jmedchem.7b01249 (2018).
- 1047 74 King, L. B. *et al.* Cross-reactive neutralizing human survivor monoclonal antibody  
1048 BDBV223 targets the ebolavirus stalk. *Nat. Commun.* **10**, 1788, doi:10.1038/s41467-019-  
1049 09732-7 (2019).
- 1050 75 Dolnik, O. *et al.* Ectodomain shedding of the glycoprotein GP of Ebola virus. *EMBO J.*  
1051 **23**, 2175-2184, doi:10.1038/sj.emboj.7600219 (2004).
- 1052 76 Maruyama, T. *et al.* Ebola virus can be effectively neutralized by antibody produced in  
1053 natural human infection. *J. Virol.* **73**, 6024-6030 (1999).
- 1054 77 Janus, B. M. *et al.* Structural basis for broad neutralization of ebolaviruses by an antibody  
1055 targeting the glycoprotein fusion loop. *Nat. Commun.* **9**, doi:10.1038/s41467-018-06113-  
1056 4 (2018).
- 1057 78 Yin, H. S., Wen, X. L., Paterson, R. G., Lamb, R. A. & Jardetzky, T. S. Structure of the  
1058 parainfluenza virus 5 F protein in its metastable, prefusion conformation. *Nature* **439**, 38-  
1059 44, doi:10.1038/nature04322 (2006).
- 1060 79 Liu, J., Shu, W., Fagan, M. B., Nunberg, J. H. & Lu, M. Structural and functional  
1061 analysis of the HIV gp41 core containing an Ile573 to Thr substitution: Implications for  
1062 membrane fusion. *Biochemistry* **40**, 2797-2807, doi:10.1021/bi0024759 (2001).
- 1063 80 Malashkevich, V. N. *et al.* Core structure of the envelope glycoprotein GP2 from Ebola  
1064 virus at 1.9-Å resolution. *Proc. Natl. Acad. Sci. U. S. A.* **96**, 2662-2667,  
1065 doi:10.1073/pnas.96.6.2662 (1999).
- 1066 81 Koellhoffer, J. F. *et al.* Crystal structure of the Marburg virus GP2 core domain in its  
1067 postfusion conformation. *Biochemistry* **51**, 7665-7675, doi:10.1021/bi300976m (2012).
- 1068 82 Harrison, J. S., Koellhoffer, J. F., Chandran, K. & Lai, J. R. Marburg virus glycoprotein  
1069 GP2: pH-dependent stability of the ectodomain  $\alpha$ -helical bundle. *Biochemistry* **51**, 2515-  
1070 2525, doi:10.1021/bi3000353 (2012).
- 1071 83 Wang, Q. *et al.* Stabilized diverse HIV-1 envelope trimers for vaccine design. *Emerg.*  
1072 *Microbes Infect.* **9**, 775-786, doi:10.1080/22221751.2020.1745093 (2020).
- 1073 84 Rutten, L. *et al.* Structure-based design of prefusion-stabilized filovirus glycoprotein  
1074 trimers. *Cell Rep.* **30**, 4540-4550.e4543, doi:10.1016/j.celrep.2020.03.025 (2020).
- 1075 85 McLellan, J. S. *et al.* Structure-based design of a fusion glycoprotein vaccine for  
1076 respiratory syncytial virus. *Science* **342**, 592-598, doi:10.1126/science.1243283 (2013).
- 1077 86 Hastie, K. M. *et al.* Structural basis for antibody-mediated neutralization of Lassa virus.  
1078 *Science* **356**, 923-928, doi:10.1126/science.aam7260 (2017).
- 1079 87 Leaver-Fay, A. *et al.* ROSETTA3: An object-oriented software suite for the simulation  
1080 and design of macromolecules. *Methods Enzymol.* **487**, 545-574, doi:10.1016/s0076-  
1081 6879(11)87019-9 (2011).
- 1082 88 Bachmann, M. F. & Jennings, G. T. Vaccine delivery: a matter of size, geometry, kinetics  
1083 and molecular patterns. *Nat. Rev. Immunol.* **10**, 787-796, doi:10.1038/nri2868 (2010).

- 1084 89 Marcandalli, J. *et al.* Induction of potent neutralizing antibody responses by a designed  
1085 protein nanoparticle vaccine for respiratory syncytial virus. *Cell* **176**, 1420-1431.e1417,  
1086 doi:10.1016/j.cell.2019.01.046 (2019).
- 1087 90 Bale, J. B. *et al.* Accurate design of megadalton-scale two-component icosahedral protein  
1088 complexes. *Science* **353**, 389-394, doi:10.1126/science.aaf8818 (2016).
- 1089 91 Winstead, C. R., Zhai, S. K., Sethupathi, P. & Knight, K. L. Antigen-induced somatic  
1090 diversification of rabbit IgH genes: Gene conversion and point mutation. *J. Immunol.*  
1091 **162**, 6602-6612 (1999).
- 1092 92 Morris, C. D. *et al.* Differential antibody responses to conserved HIV-1 neutralizing  
1093 epitopes in the context of multivalent scaffolds and native-like gp140 trimers. *mBio* **8**,  
1094 e00036-00017, doi: 10.1128/mBio.00036-17 (2017).
- 1095 93 Martins, K. A., Jahrling, P. B., Bavari, S. & Kuhn, J. H. Ebola virus disease candidate  
1096 vaccines under evaluation in clinical trials. *Expert Rev. Vaccines* **15**, 1101-1112,  
1097 doi:10.1080/14760584.2016.1187566 (2016).
- 1098 94 Rijal, P. *et al.* Therapeutic monoclonal antibodies for Ebola virus infection derived from  
1099 vaccinated humans. *Cell Rep.* **27**, 172-186.e177, doi:10.1016/j.celrep.2019.03.020  
1100 (2019).
- 1101 95 Ewer, K. *et al.* A monovalent chimpanzee adenovirus Ebola vaccine boosted with MVA.  
1102 *N. Engl. J. Med.* **374**, 1635-1646, doi:10.1056/NEJMoa1411627 (2016).
- 1103 96 Meyer, M., Malherbe, D. C. & Bukreyev, A. Can Ebola virus vaccines have universal  
1104 immune correlates of protection? *Trends Microbiol.* **27**, 8-16,  
1105 doi:10.1016/j.tim.2018.08.008 (2019).
- 1106 97 Bruun, T. U. J., Andersson, A. M. C., Draper, S. J. & Howarth, M. Engineering a rugged  
1107 nanoscaffold to enhance plug-and-display vaccination. *ACS Nano* **12**, 8855-8866,  
1108 doi:10.1021/acsnano.8b02805 (2018).
- 1109 98 Zakeri, B. *et al.* Peptide tag forming a rapid covalent bond to a protein, through  
1110 engineering a bacterial adhesin. *Proc. Natl. Acad. Sci. U. S. A.* **109**, E690-E697,  
1111 doi:10.1073/pnas.1115485109 (2012).
- 1112 99 Elsliger, M.-A. *et al.* The JCSG high-throughput structural biology pipeline. *Acta*  
1113 *Crystallogr. Sect. F Struct. Biol. Cryst. Commun.* **66**, 1137-1142,  
1114 doi:10.1107/s1744309110038212 (2010).
- 1115 100 Otwinowski, Z. & Minor, W. Processing of X-ray diffraction data collected in oscillation  
1116 mode. *Methods Enzymol.* **276**, 307-326, doi:10.1016/s0076-6879(97)76066-x (1997).
- 1117 101 McCoy, A. J. *et al.* Phaser crystallographic software. *J. Appl. Crystallogr.* **40**, 658-674,  
1118 doi:10.1107/s0021889807021206 (2007).
- 1119 102 Potterton, E., Briggs, P., Turkenburg, M. & Dodson, E. A graphical user interface to the  
1120 CCP4 program suite. *Acta Crystallogr. D Biol. Crystallogr.* **59**, 1131-1137,  
1121 doi:10.1107/s0907444903008126 (2003).
- 1122 103 Vagin, A. & Teplyakov, A. Molecular replacement with MOLREP. *Acta Crystallogr. D*  
1123 *Biol. Crystallogr.* **66**, 22-25, doi:10.1107/s0907444909042589 (2010).
- 1124 104 Emsley, P., Lohkamp, B., Scott, W. G. & Cowtan, K. Features and development of Coot.  
1125 *Acta Crystallogr. D Biol. Crystallogr.* **66**, 486-501, doi:10.1107/s0907444910007493  
1126 (2010).
- 1127 105 Vagin, A. A. *et al.* REFMAC5 dictionary: organization of prior chemical knowledge and  
1128 guidelines for its use. *Acta Crystallogr. D Biol. Crystallogr.* **60**, 2184-2195,  
1129 doi:10.1107/s0907444904023510 (2004).

- 1130 106 Chen, V. B. *et al.* MolProbity: all-atom structure validation for macromolecular  
1131 crystallography. *Acta Crystallogr. D Biol. Crystallogr.* **66**, 12-21,  
1132 doi:10.1107/s0907444909042073 (2010).
- 1133 107 Suloway, C. *et al.* Automated molecular microscopy: The new Legimon system. *J. Struct.*  
1134 *Biol.* **151**, 41-60, doi:10.1016/j.jsb.2005.03.010 (2005).
- 1135 108 Punjani, A., Rubinstein, J. L., Fleet, D. J. & Brubaker, M. A. cryoSPARC: algorithms for  
1136 rapid unsupervised cryo-EM structure determination. *Nat. Methods* **14**, 290-296,  
1137 doi:10.1038/nmeth.4169 (2017).
- 1138 109 Diehl, W. E. *et al.* Ebola virus glycoprotein with increased infectivity dominated the  
1139 2013-2016 epidemic. *Cell* **167**, 1088-1098.e1086, doi:10.1016/j.cell.2016.10.014 (2016).
- 1140

1141 **Acknowledgments**

1142 We thank Mansun Law and Juan Carlos de la Torre at The Scripps Research Institute and  
1143 Sujan Shresta at the La Jolla Institute for Immunology for helpful discussions. We thank  
1144 Christiana Corbaci for creating images used in Figs. 5a, 5e, and 6a and Michael Arends for  
1145 proofreading the manuscript. Diffraction data were collected at the Advanced Photon Source  
1146 (APS) beamline 23-IDD, and Stanford Synchrotron Radiation Lightsource (SSRL) beamline  
1147 12-2. Use of the APS was supported by the DOE, Basic Energy Sciences, Office of Science,  
1148 under contract no. DE-AC02-06CH11357. Use of the SSRL was supported by the US  
1149 Department of Energy, Basic Energy Sciences, Office of Science, under contract no. DE-  
1150 AC02-76SF00515. This work was funded in part by NIH grants AI129698 (to J.Z.), AI140844  
1151 (to J.Z. and I.A.W.), UfoVax/SFP-2018-0416, and UfoVax/SFP-2018-1013 (to J.Z.).

1152 **Author contributions**

1153 Project design by L.H., A.C., X.L., I.A.W., and J.Z.; rational design of EBOV GPΔMuc trimers  
1154 and nanoparticles by L.H. and J.Z.; plasmid design and processing by L.H. and C.S.; antigen  
1155 production, purification, and biochemical characterization by A.C., L.H., X.L., E.K., and T.N.;  
1156 EBOV antibody production by X.L., E.K., and T.N.; negative-stain EM by T.A., G.O., and  
1157 A.B.W.; DSC measurement by S.K.; crystallography by A.C. and R.L.S.; BLI by L.H. and J.Z.;  
1158 mouse plasma-antigen ELISA by L.H. and X.L.; plasma IgG purification by L.H. and C.S.  
1159 ebolavirus-pp and MLV-pp neutralization assays by X.L.; antigen-specific mouse B cell sorting  
1160 by C.S. and L.H.; mouse B cell library preparation and NGS by L.H. and C.S.; bioinformatics  
1161 analysis by L.H. and J.Z.; Manuscript written by L.H., A.C., X.L., I.A.W., and J.Z. All authors  
1162 were asked to comment on the manuscript. The TSRI manuscript number is 30009.

1163 **Competing interests**

1164 The authors declare that they have no competing interests.

## 1165 **Figure legends**

### 1166 **Fig. 1. Design and characterization of EBOV GP $\Delta$ muc trimers with modified HR2 stalk. (a)**

1167 Left: Schematic representation of EBOV GP and GP $\Delta$ muc. GP1 N/C termini (GP1<sub>N/C</sub>), mucin-  
1168 like domain (MLD), internal fusion loop (IFL), heptad repeat regions 1/2 (HR1/HR2),  
1169 transmembrane region (TM), and cytoplasmic tail (CT) are labeled with *N*-linked glycans, which  
1170 are indicated as gray (mutated), red, and pink (within MLD) branches. Right: Ribbon  
1171 representation of EBOV GP (PDB: 5JQ3) in transparent molecular surface, with GP1 in dodger  
1172 blue and GP2 in yellow. The MLD and foldon are shown as a gray half oval and a green  
1173 rectangle, respectively. **(b)** Schematic representation of mAb114 bound to EBOV GP (left), SEC  
1174 profiles of mAb114-purified GP $\Delta$ muc and GP $\Delta$ muc-foldon (middle) from a Superdex 200  
1175 10/300 column, and BN-PAGE gel (right). **(c)** Schematic representation of mAb100 bound to  
1176 EBOV GP (left), SEC profiles of mAb100-purified GP $\Delta$ muc and GP $\Delta$ muc-foldon (middle) from  
1177 a Superdex 200 10/300 column, and BN-PAGE gel (right). In (b) and (c), GP species (A:  
1178 aggregate; T: trimer; D: dimer; M: monomer) are labeled on the SEC profile and BN-PAGE gel.  
1179 **(d)** Ribbon representation of EBOV HR2 stalk (left) and MARV HR2 stalk (right) with CX<sub>6</sub>CC  
1180 motif and residues of interest indicated. Middle: Logo analysis of EBOV and MARV HR2  
1181 sequences. **(e)** Schematic representation of GP $\Delta$ muc-W615L-L (or WL<sup>2</sup>)-foldon. **(f)** SEC profiles  
1182 of 293F-expressed, mAb100-purified GP $\Delta$ muc-foldon and GP $\Delta$ muc-WL<sup>2</sup>-foldon from a HiLoad  
1183 Superdex 200 16/600 column for three production runs. **(g)** Thermostability of GP $\Delta$ muc-foldon  
1184 and GP $\Delta$ muc-WL<sup>2</sup>-foldon, with T<sub>m</sub>,  $\Delta$ T<sub>1/2</sub>, and T<sub>on</sub> measured by DSC. **(h)** EC<sub>50</sub> ( $\mu$ g/ml) values of  
1185 EBOV GP-foldon, GP $\Delta$ muc-foldon, GP $\Delta$ muc-W615L-foldon, and GP $\Delta$ muc-WL<sup>2</sup>-foldon binding



1186 to 10 representative antibodies. Four pan-Ebolavirus NABs are colored in red. Antibody binding  
1187 was measured by ELISA in duplicates, with mean value and standard deviation (SD) shown as  
1188 black and red lines, respectively. Source data are provided as a Source Data file.

1189 **Fig. 2. Design and characterization of EBOV GP $\Delta$ muc trimers with modified HR1<sub>C</sub> bend.**

1190 **(a)** Ribbon representation of EBOV GP $\Delta$ muc protomer (PDB: 5JQ3) in transparent molecular  
1191 surface with GP1 in dodger blue, GP2 in yellow, and HR1<sub>C</sub> bends from three protomers in red.  
1192 Left: side view. Right: top view. **(b)** Left: Ribbon representation of the HR1 region in the  
1193 prefusion (top, PDB ID: 5JQ3) and postfusion (bottom, PDB ID: 2EBO) states with the HR1  
1194 region in yellow and the HR1<sub>C</sub> bend in red. Right: Zoomed-in view of the HR1<sub>C</sub> bend with the  
1195 eight residues in this region shown as sticks and labeled with the proline mutations, P<sup>1</sup>-P<sup>8</sup>. **(c)**  
1196 SEC profiles of mAb114-purified GP $\Delta$ muc-W615L-P<sup>n</sup> variants (n=1 to 8) from a Superdex 200  
1197 10/300 column. SEC profiles of mAb100-purified GP $\Delta$ muc-W615L-P<sup>2</sup> and -P<sup>4</sup> are shown in the  
1198 red dotted line. Trimer (T), dimer (D), and monomer (M) peaks are labeled on the SEC profiles  
1199 for P<sup>2</sup> and P<sup>4</sup>, with the trimer peak marked with a black dashed line. **(d)** BN-PAGE gel of  
1200 mAb114-purified GP $\Delta$ muc-W615L-P<sup>n</sup> variants (n=1 to 8). **(e)** SEC profiles of 293F-expressed,  
1201 mAb100-purified GP $\Delta$ muc-W615L-L-P<sup>2</sup> (or WL<sup>2</sup>P<sup>2</sup>)-foldon from a HiLoad Superdex 200  
1202 16/600 column (left) and BN-PAGE gel of SEC fractions 41-63 (55.5-62.0 ml) (right). SEC  
1203 profiles were from three production runs. **(f)** Thermostability of GP $\Delta$ muc-WL<sup>2</sup>P<sup>2</sup>-foldon and  
1204 GP $\Delta$ muc-WL<sup>2</sup>P<sup>4</sup>-foldon, with T<sub>m</sub>,  $\Delta$ T<sub>1/2</sub>, and T<sub>on</sub> measured by DSC. **(g)** EC<sub>50</sub> ( $\mu$ g/ml) values of  
1205 EBOV GP-foldon, GP $\Delta$ muc-foldon, GP $\Delta$ muc-W615L-foldon, GP $\Delta$ muc-WL<sup>2</sup>-foldon, and  
1206 GP $\Delta$ muc-WL<sup>2</sup>P<sup>2</sup>-foldon binding to 10 representative antibodies. Four pan-Ebolavirus NABs are  
1207 colored in red. Antibody binding was measured by ELISA in duplicates, with mean value and

1208 standard deviation (SD) shown as black and red lines, respectively. **(h)**  $K_D$  values of GP $\Delta$ Muc-  
1209 foldon and GP $\Delta$ muc-WL<sup>2</sup>P<sup>2</sup>-foldon binding to 10 representative antibodies. BLI was performed  
1210 on an Octet RED96 instrument using a trimer titration series of six concentrations (400-12.5 nM  
1211 by twofold dilution) and kinetics (AHC) biosensors. The  $K_D$  values were calculated using a  
1212 global fit 2:1 model. Source data are provided as a Source Data file.

1213 **Fig. 3 Structural characterization of EBOV GP with stalk and HR1<sub>C</sub> mutations.** **(a)** The  
1214 3.2Å-resolution crystal structure of EBOV GP $\Delta$ muc-WL<sup>2</sup>P<sup>2</sup>-foldon in a ribbon representation  
1215 (top view and side view). GP1 is shown in dodger blue, except for the glycan cap, which is in  
1216 gray. GP2 is shown in yellow with the internal fusion loop (IFL) in pink. *N*-linked glycans at  
1217 N238, N257, and N563 are shown as sticks. **(b)** Ribbon representation of a GP $\Delta$ muc-WL<sup>2</sup>P<sup>2</sup>  
1218 protomer in the center with inset images showing structural comparison for the HR1<sub>C</sub> bend (left),  
1219 W615-surrounding HR2 region (bottom right), and C terminus of the HR2 stalk (right). For the  
1220 HR1<sub>C</sub> bend, WL<sup>2</sup>P<sup>2</sup> is superimposed onto GP $\Delta$ muc (PDB ID: 5JQ3) (top) with three hydrogen  
1221 bonds labeled for WL<sup>2</sup>P<sup>2</sup> (middle) and GP $\Delta$ muc (bottom). For the W615-surrounding HR2  
1222 region, WL<sup>2</sup>P<sup>2</sup> is superimposed onto GP $\Delta$ muc (PDB ID: 5JQ3) (top) with the coiled-coil  
1223 structure shown for GP $\Delta$ muc (left) and WL<sup>2</sup>P<sup>2</sup> (right). C $\alpha$  and C $\beta$  distances for residue 615  
1224 around the threefold axis are labeled. For the HR2 C terminus, WL<sup>2</sup>P<sup>2</sup> is superimposed onto GP  
1225 structures of SUDV (top), EBOV (middle), and BDBV (bottom) with C $\alpha$  RMSDs calculated  
1226 after fitting. The 2Fo – Fc electron density map contoured at 1 $\sigma$  is shown as a gray mesh for the  
1227 WL<sup>2</sup>P<sup>2</sup> protomer (center) and HR2 stalks (right).

1228 **Fig. 4. Design and characterization of EBOV GP $\Delta$ Muc-presenting nanoparticles.** **(a)**  
1229 Surface models of nanoparticle (NP) carriers and GP $\Delta$ Muc-presenting NPs. The three NP

1230 carriers shown here are 24-meric ferritin (FR) and 60-meric E2p and I3-01. The NP size is  
1231 indicated by diameter (in nm). **(b)** SEC profiles of wildtype GPΔMuc (black) and WL<sup>2</sup>P<sup>2</sup>  
1232 (magenta)-presenting FR, E2p, and I3-01 NPs obtained from a Superose 6 10/300 GL column  
1233 after mAb100 purification. The particle fraction is indicated by a dotted-line box for FR. **(c)**  
1234 Negative stain EM images of SEC-purified GPΔMuc-WL<sup>2</sup>P<sup>2</sup>-presenting FR, E2p, and I3-01 NPs.  
1235 **(d)** Schematic representation of multilayered NP design, in which a dimeric locking domain  
1236 (LD) is fused to the C-terminus of an NP subunit, and a helper T-cell epitope (PADRE) is fused  
1237 to the C-terminus of an LD. **(e)** SEC profiles of GPΔMuc-WL<sup>2</sup>P<sup>2</sup>-presenting E2p NPs with LDs  
1238 1-7 and I3-02 NPs with five LDs (4-5 and 7-9) after mAb100 purification. **(f)** SEC profiles of  
1239 GPΔMuc-WL<sup>2</sup>P<sup>2</sup>-presenting E2p NP with LD4 and PADRE, or E2p-L4P (left), and I3-01/v9 NP  
1240 with LD7 and PADRE, or I3-01/v9-L7P (right). I3-01v9 is a variant of I3-01 with a redesigned  
1241 NP-forming interface. **(g)** BN-PAGE of GPΔMuc-WL<sup>2</sup>P<sup>2</sup>-presenting FR, E2p, and I3-01/v9 NPs,  
1242 with LD and PADRE variants included for E2p and I3-01/v9. Low molecular weight (m.w.)  
1243 bands are circled with red dotted lines. Black line indicates the gels on the left and right were  
1244 generated from two separate experiments. **(h)** Negative-stain EM images of SEC-purified FR,  
1245 E2p-L4P, and I3-01v9-L7P NPs that present the GPΔMuc-WL<sup>2</sup>P<sup>2</sup> trimer. Samples are shown as  
1246 a composite of two panels, each representing a different micrograph. **(i)** EC<sub>50</sub> (μg/ml) values of  
1247 GPΔMuc-WL<sup>2</sup>P<sup>2</sup>-foldon and GPΔMuc-WL<sup>2</sup>P<sup>2</sup>-presenting NPs binding to 10 respective  
1248 antibodies. Four pan-Ebolavirus NABs are colored in red. Antibody binding was measured by  
1249 ELISA in duplicates, with mean value and standard deviation (SD) shown as black and red lines,  
1250 respectively. **(j)** Antigenic profiles of GPΔMuc-WL<sup>2</sup>P<sup>2</sup>-foldon and GPΔMuc-WL<sup>2</sup>P<sup>2</sup>-presenting  
1251 NPs against 10 antibodies. Two BLI experiments were performed with three replicates tested for  
1252 the highest antigen concentration. Sensorgrams were obtained from an Octet RED96 using an

1253 antigen titration series of six concentrations (400-12.5 nM by twofold dilution for trimer, 25-0.78  
1254 nM by twofold dilution for FR, and 10-0.31 nM for multilayered E2p and I3-01v9) and  
1255 quantitation (AHQ) biosensors. The average peak signals (nm) at the highest antigen  
1256 concentration are listed in the matrix with the standard deviation (SD) shown in Fig. S6f. A  
1257 higher color intensity indicates greater binding signal. Source data are provided as a Source Data  
1258 file.

1259 **Fig. 5. Immunogenicity of EBOV GPΔMuc trimers and nanoparticles in mice.** (a) Schematic  
1260 representation of the mouse immunization protocol. (b) Longitudinal analysis of GP-specific  
1261 antibody titers in immunized mouse sera (n=8) at w2, w5, w8, and w11. Top panel: EC<sub>50</sub> titers  
1262 (fold of dilution) calculated from ELISA binding of mouse sera from three GP trimer groups to  
1263 the coating antigen, GPΔMuc-WL<sup>2</sup>P<sup>2</sup>. Bottom panel: EC<sub>50</sub> titers calculated from ELISA binding  
1264 of mouse sera from three NP groups to the coating antigen, GPΔMuc-WL<sup>2</sup>P<sup>2</sup>, with the GPΔMuc-  
1265 WL<sup>2</sup>P<sup>2</sup>-foldon group included for comparison. Mean values and standard deviation (SD) are  
1266 shown as black lines. *P*-values were determined by an unpaired two-tailed *t* test in GraphPad  
1267 Prism 8.4.3 and are labeled on the plots. The asterisk symbol (\*) indicates the level of statistical  
1268 significance: \*, *P* < 0.05; \*\*, *P* < 0.01; \*\*\*, *P* < 0.001; \*\*\*\*, *p* < 0.0001. (c) Ebolavirus-pp  
1269 (EBOV-Makona and BDBV-Uganda) neutralization by 10 antibodies in 293 T cells. The  
1270 neutralization was performed in duplicates. The half maximal inhibitory concentration (IC<sub>50</sub>)  
1271 values are listed with the enhanced pseudovirus infection (<-30%) indicated by an asterisk (\*).  
1272 (d) Ebolavirus-pp (EBOV-Makona and BDBV-Uganda) neutralization by purified mouse IgGs  
1273 from six vaccine groups in 293 T cells. The neutralization was performed without duplicates due  
1274 to limited sample availability. (e) Schematic representation of the rabbit immunization protocol.  
1275 (f) Longitudinal analysis of GP-specific antibody titers in immunized rabbit sera (n=4) at weeks

1276 0, 2, 5, 8, 11, and 13. Mean values and standard deviation (SD) are shown as black lines. **(g)**  
1277 Ebolavirus-pp (EBOV-Makona and BDBV-Uganda) neutralization by purified rabbit IgGs from  
1278 five vaccine groups in 293 T cells. The neutralization was performed in duplicates. In (d) and  
1279 (g), due to the presence of enhancement-causing non-NABs in the purified IGs, approximate  $IC_{50}$   
1280 values derived from the fitting of % neutralization data are listed for comparison, with the  
1281 enhanced pseudovirus infection ( $< -30\%$ ) indicated by an asterisk (\*). Source data are provided  
1282 as a Source Data file.

1283 **Fig. 6. Quantitative assessment of GP-specific B-cell response.** **(a)** Schematic representation  
1284 of the strategy to analyze the GP-specific murine B-cell response that combines the antigen-  
1285 specific bulk sorting of splenic B cells with next-generation sequencing (NGS) and  
1286 antibodyomics analysis. **(b)** B cell profiles for the GP $\Delta$ Muc-WL<sup>2</sup>P<sup>2</sup>-foldon (left) and GP $\Delta$ Muc-  
1287 WL<sup>2</sup>P<sup>2</sup>-E2p-L4P groups (right) and statistical comparison of key parameters derived from the  
1288 profile analysis (far right). For each vaccine group (n=8), 5 mice were selected for NGS analysis.  
1289 Panel 1/2: Distribution of germline  $V_H/V_K$  genes and statistical comparison of the number of  
1290 activated  $V_H/V_K$  genes ( $\geq 1\%$  of the total population). Panel 3: Distribution of  $V_H/V_K$  somatic  
1291 hypermutation (SHM) with percent (%) mutation calculated at the nucleotide level, and  
1292 statistical comparison of the average  $V_H/V_K$  SHM rate. Panel 4: Distribution of H/KCDR3 loop  
1293 length and statistical comparison of two parameters, HCDR3 loop length and root-mean-square  
1294 fluctuation (RMSF) of HCDR3 loop length. The RMSF value is used as an indicator of how  
1295 much HCDR3 loop length varies within the EBOV GP-specific antibodies from each animal. In  
1296 statistical comparison (far right), mean value and standard deviation (SD) are shown as black  
1297 lines. *P*-values were determined by an unpaired two-tailed *t* test in GraphPad Prism 8.4.3 and are

1298 labeled on the plots. The asterisk symbol (\*) indicates the level of statistical significance: \*,  $P <$   
1299 0.05; \*\*,  $P < 0.01$ ; \*\*\*,  $P < 0.001$ . Source data are provided as a Source Data file.

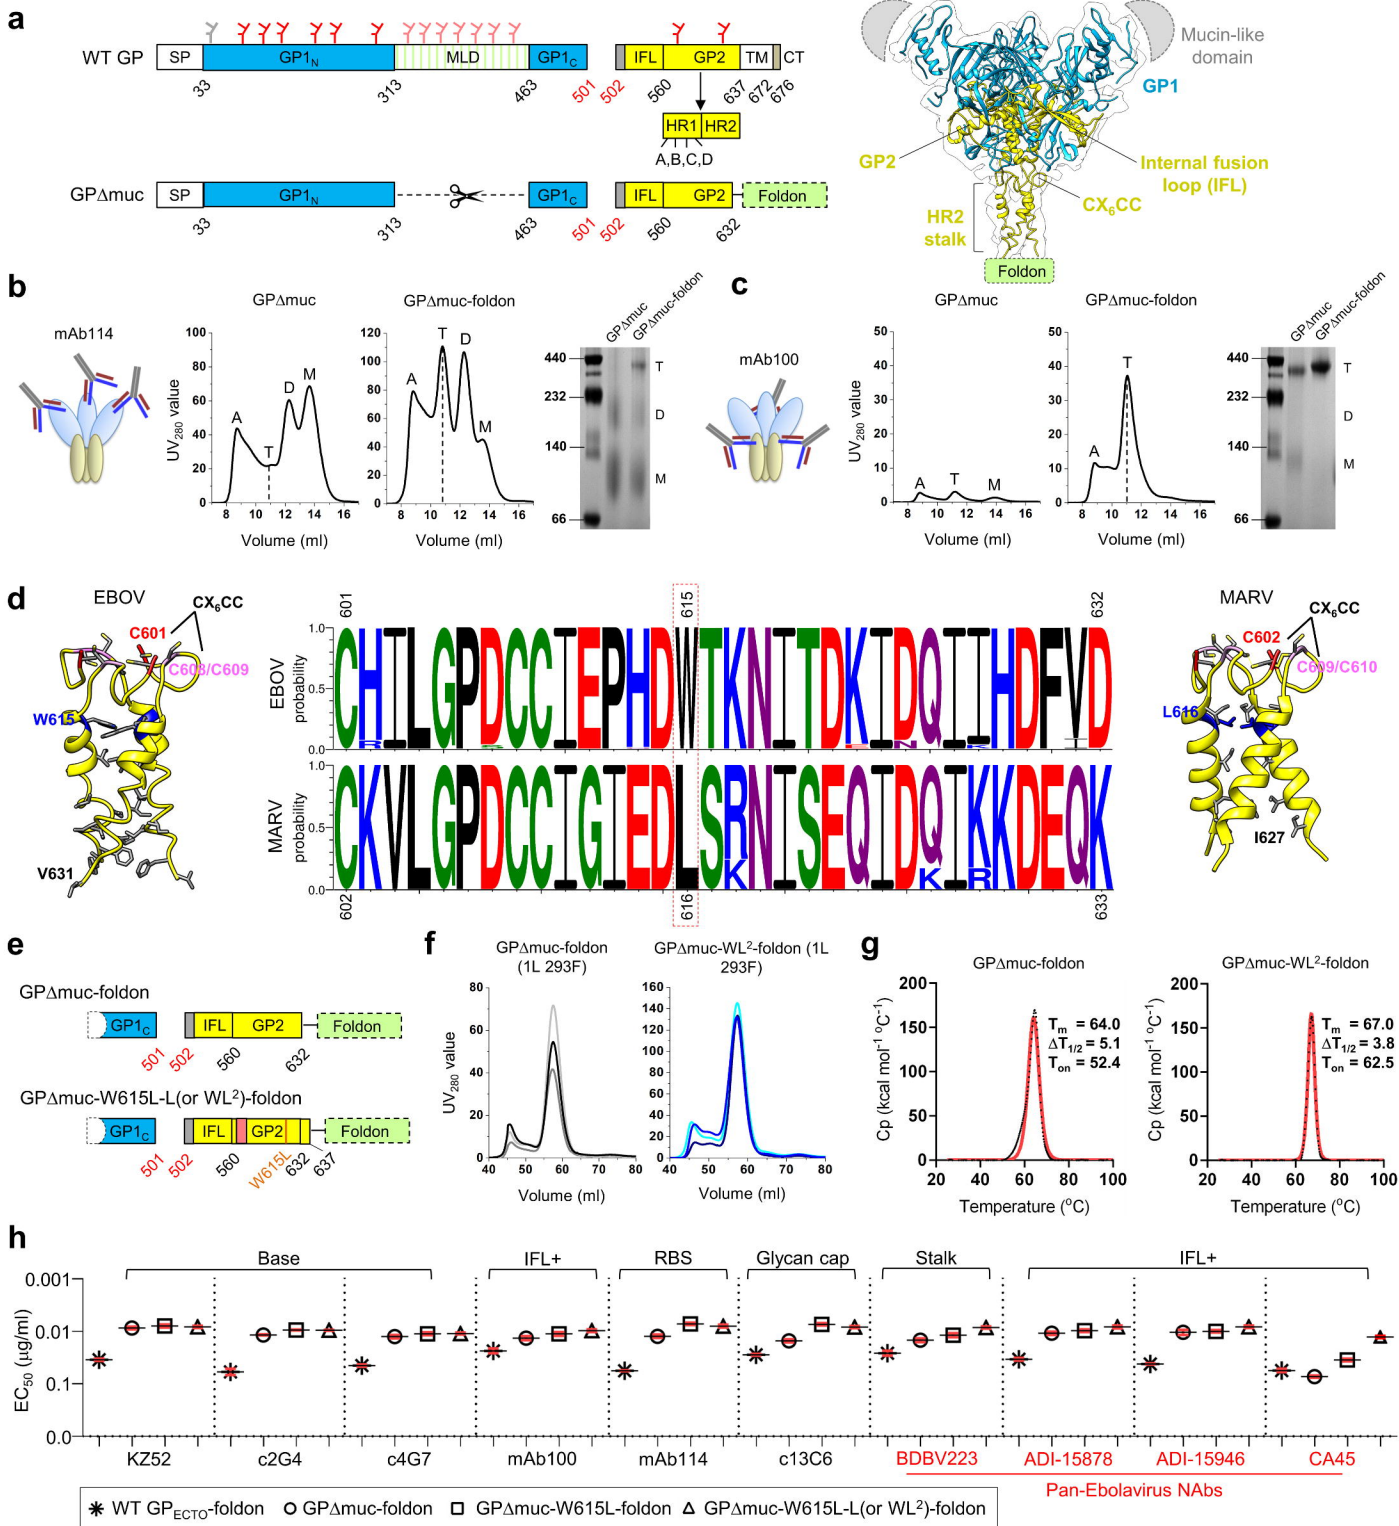

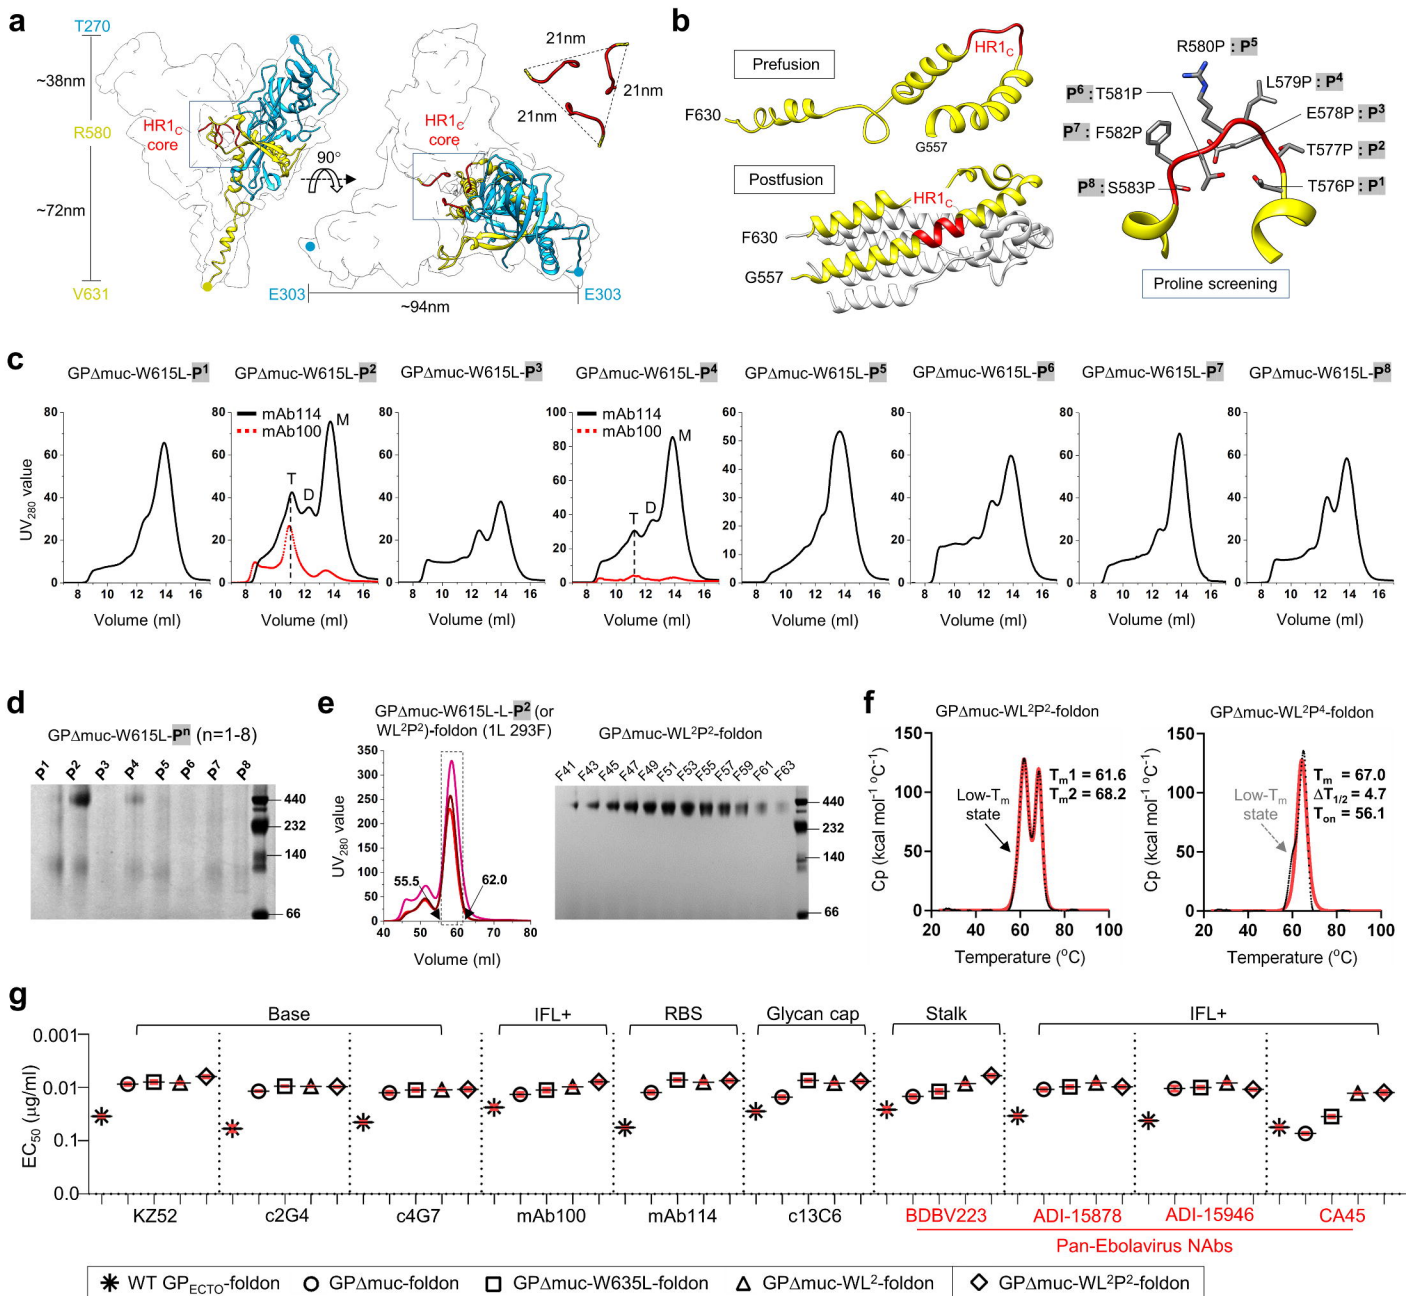



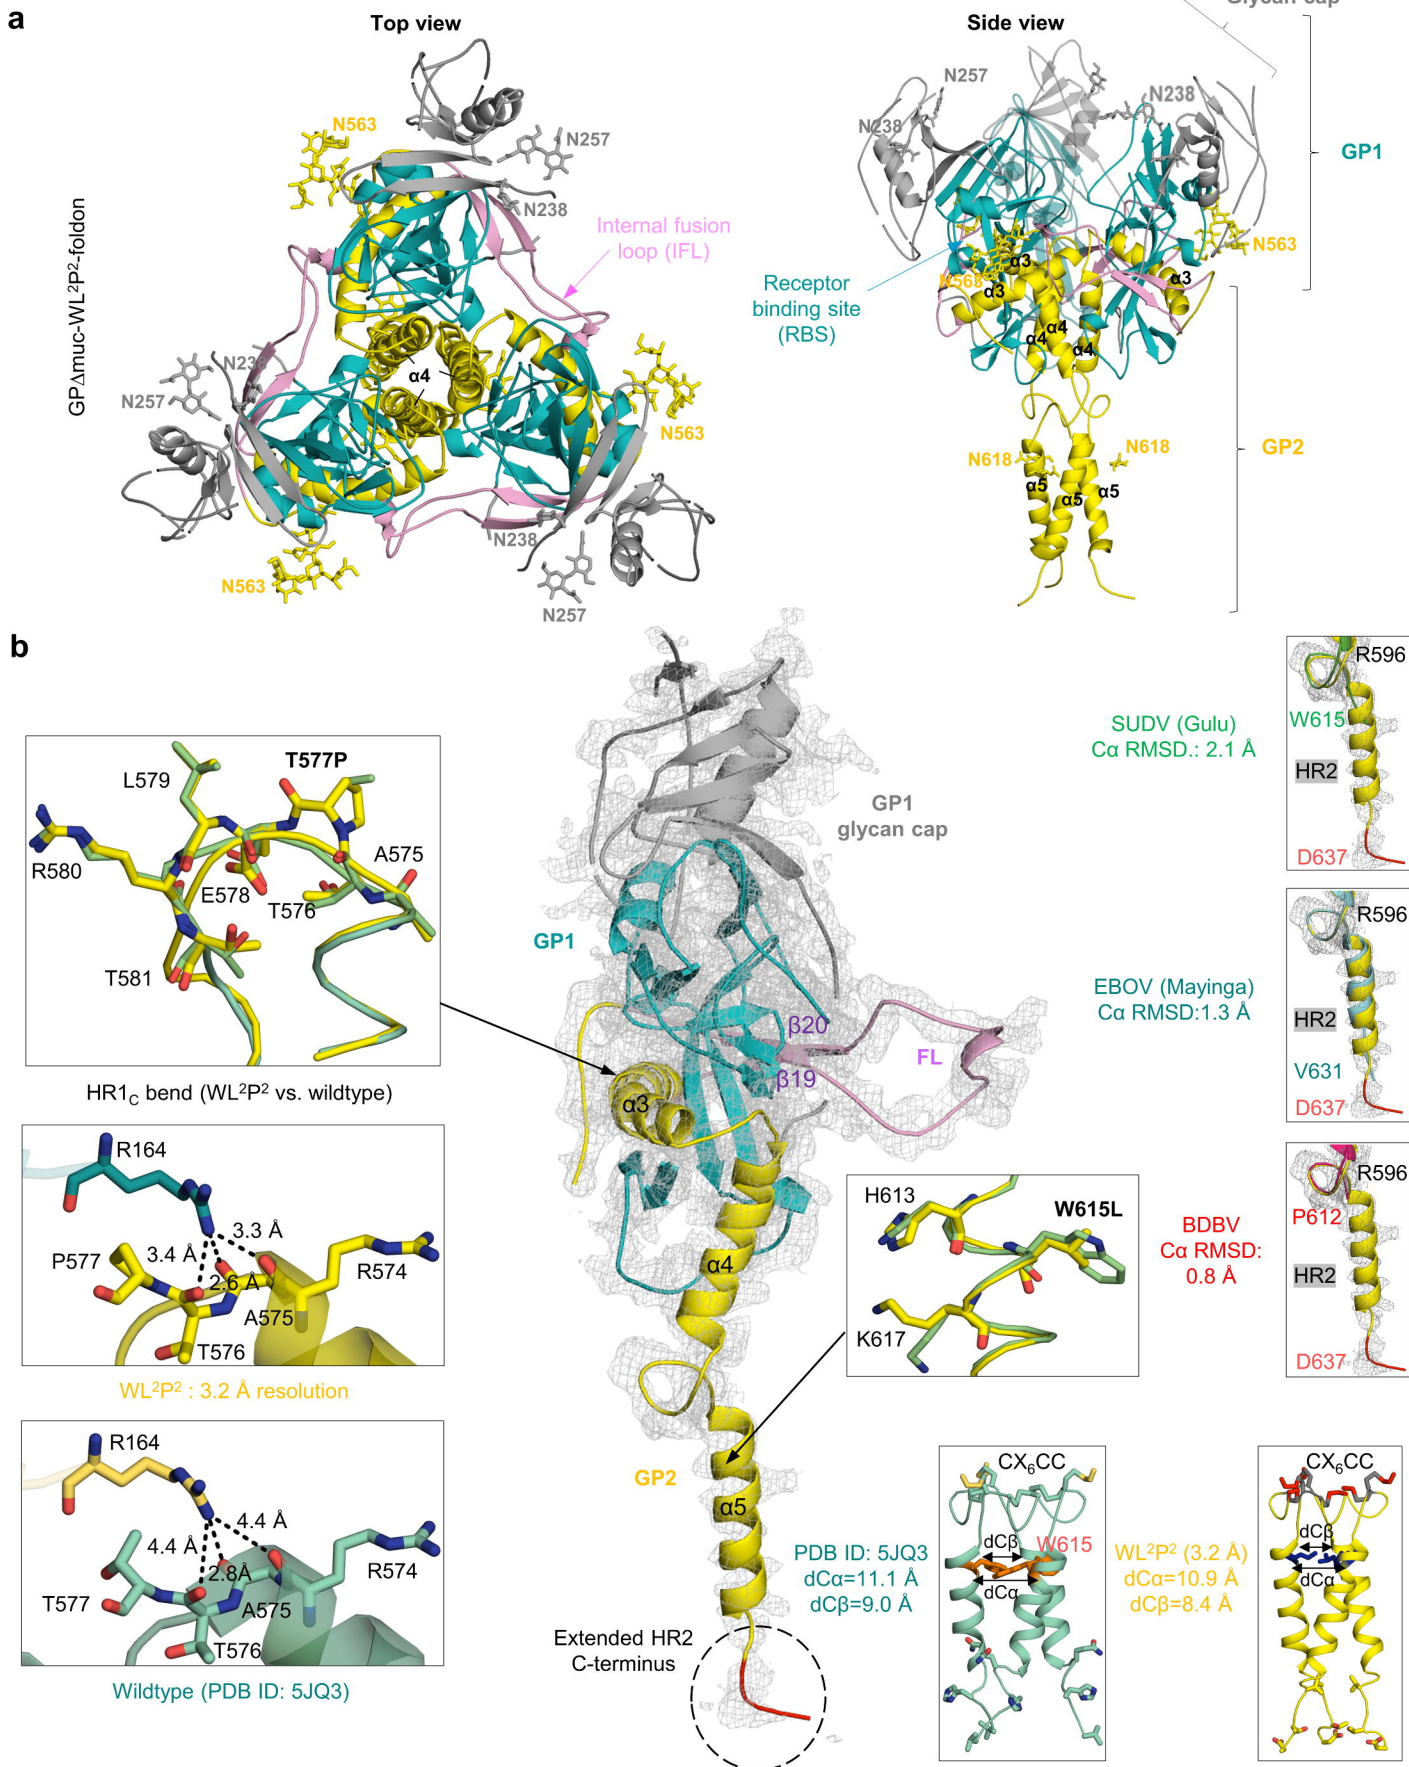

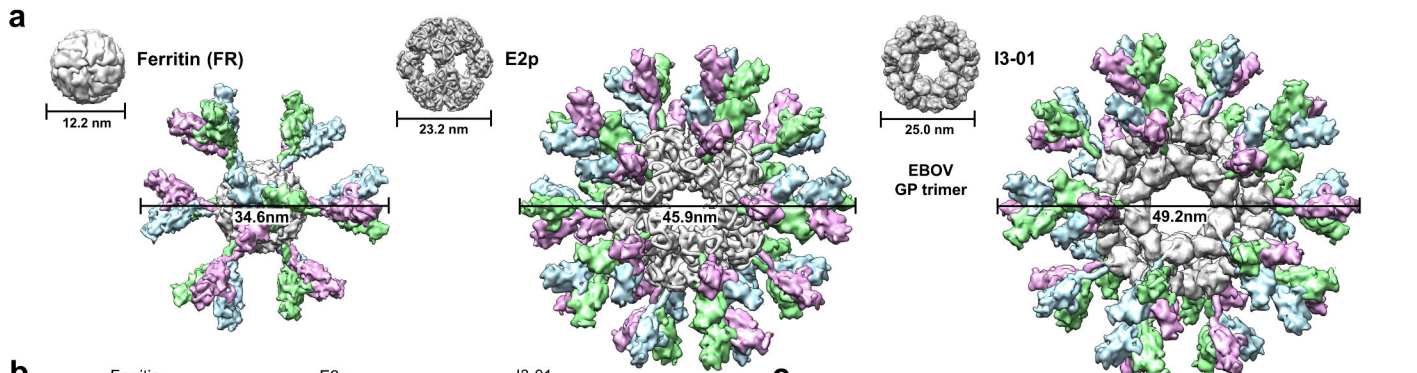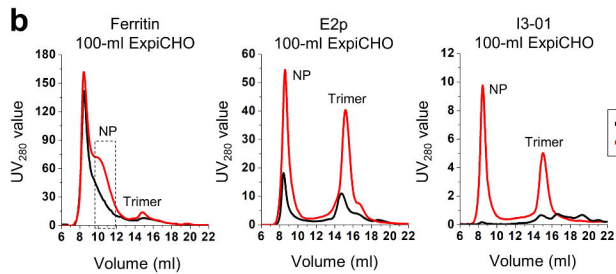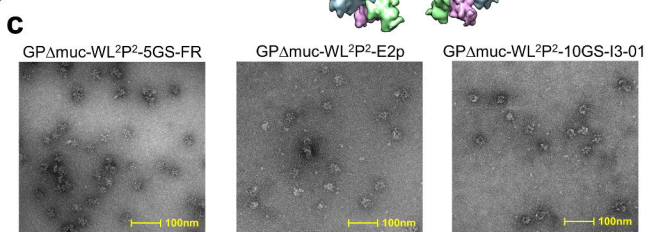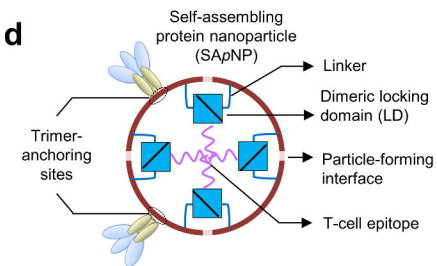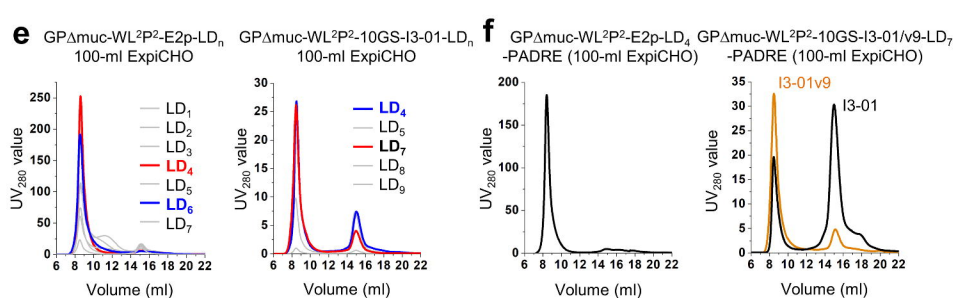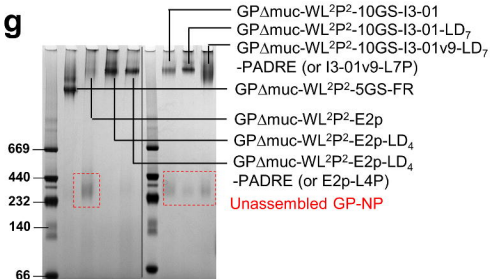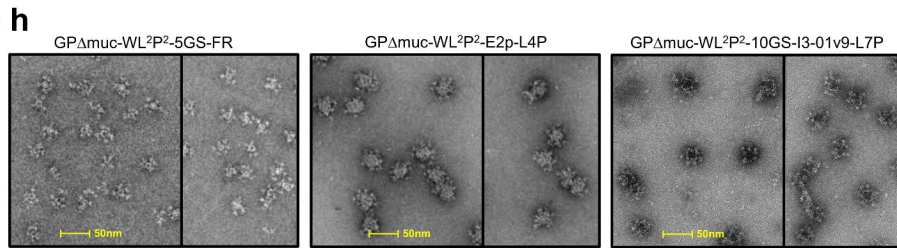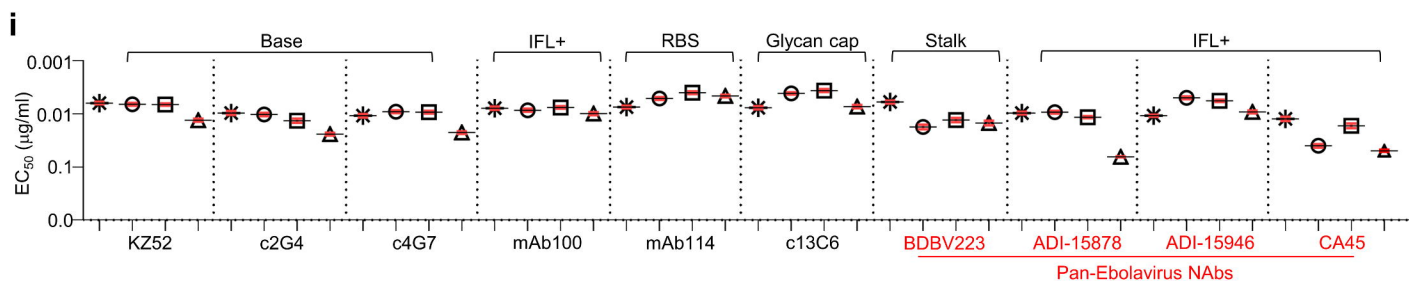

**j** Antibody binding at the highest antigen concentration (3 replicates)

| EBOV GP constructs:                                     | KZ52 | c2G4 | c4G7 | mAb100 | mAb114 | c13C6 | BDBV223 | ADI-15878 | ADI-15946 | CA45 |
|---------------------------------------------------------|------|------|------|--------|--------|-------|---------|-----------|-----------|------|
| GPΔmuc-WL <sup>2</sup> P <sup>2</sup> -foldon           | 0.70 | 0.56 | 0.67 | 0.80   | 0.91   | 0.54  | 0.71    | 0.69      | 0.47      | 0.80 |
| GPΔmuc-WL <sup>2</sup> P <sup>2</sup> -5GS-FR           | 1.37 | 1.35 | 1.44 | 1.66   | 1.82   | 1.43  | 1.31    | 1.30      | 1.38      | 1.08 |
| GPΔmuc-WL <sup>2</sup> P <sup>2</sup> -E2p-L4P          | 1.41 | 0.98 | 1.36 | 1.59   | 2.07   | 1.68  | 1.36    | 1.08      | 1.18      | 1.15 |
| GPΔmuc-WL <sup>2</sup> P <sup>2</sup> -10GS-I3-01v9-L7P | 1.00 | 1.08 | 1.37 | 1.62   | 1.65   | 1.44  | 1.43    | 1.13      | 1.31      | 0.89 |

\* GPΔmuc-WL<sup>2</sup>P<sup>2</sup>-foldon  
 ○ GPΔmuc-WL<sup>2</sup>P<sup>2</sup>-5GS-FR  
 □ GPΔmuc-WL<sup>2</sup>P<sup>2</sup>-E2p-L4P  
 △ GPΔmuc-WL<sup>2</sup>P<sup>2</sup>-10GS-I3-01v9-L7P

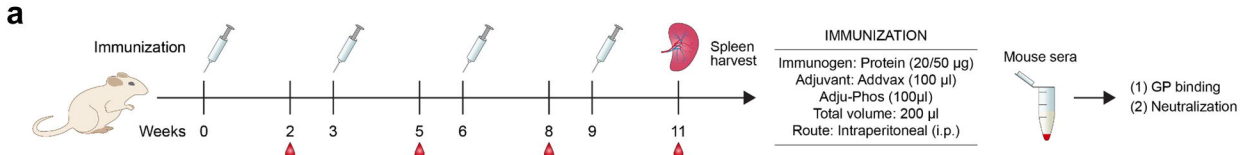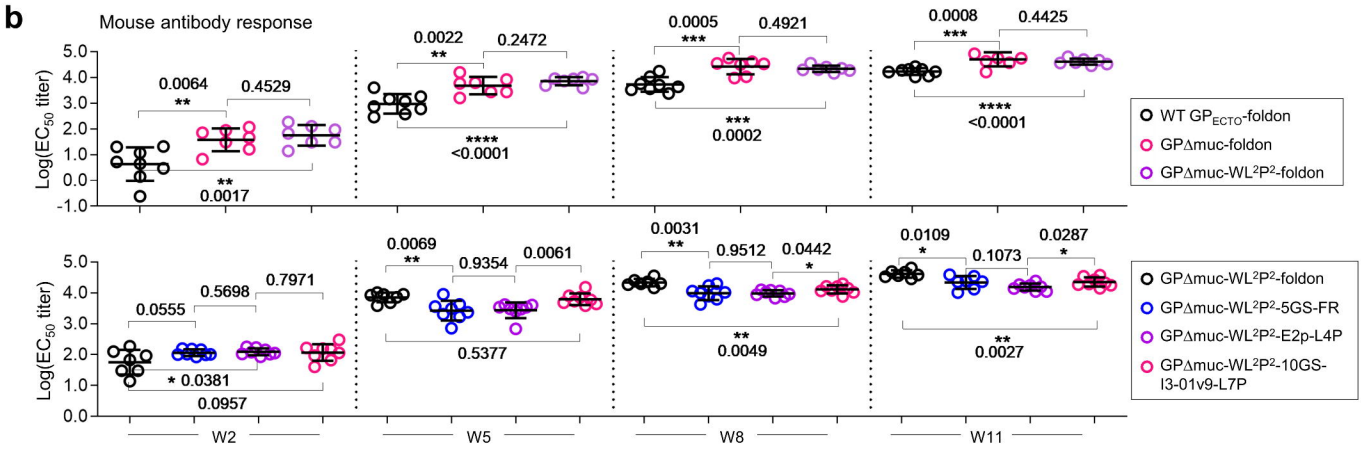

**c**

Known neutralizing antibodies (NAbs) against ebolaviruses <sup>1</sup>

|        | Nabs |      |      |         |        | Cross-reactive NAbs |           |           |         |       | Non-NAbs |
|--------|------|------|------|---------|--------|---------------------|-----------|-----------|---------|-------|----------|
|        | KZ52 | c2G4 | c4G7 | mAb100  | mAb114 | BDBV223             | ADI-15878 | ADI-15946 | CA45    | c13C6 |          |
| Makona | 5.6  | 4.2  | 3.6  | 5.9     | 4.2    | >10                 | 2.9       | 2.2       | 9.9E-01 | >10 * |          |
| BDBV   | >10  | >10  | >10  | 1.8E-01 | >10    | 1.2E-01             | 3.4E-02   | 2.7E-02   | 7.8E-02 | >10 * |          |

<sup>1</sup> IC<sub>50</sub> values were derived from the fitting of %neutralization data. (\*): %neutralization < -30%, indicative of enhanced infection. Color coding (red-green): potency (high-low).

**d**

GP trimer and nanoparticle-induced mixed NAb/non-NAb response in mice at week 11 <sup>1</sup>

|                                          | EBOV-Makona        |                    |                    |                    |                    |                    |                    |                    | BDBV-Uganda        |                    |                    |                    |                    |                    |                    |                    |
|------------------------------------------|--------------------|--------------------|--------------------|--------------------|--------------------|--------------------|--------------------|--------------------|--------------------|--------------------|--------------------|--------------------|--------------------|--------------------|--------------------|--------------------|
|                                          | M1                 | M2                 | M3                 | M4                 | M5                 | M6                 | M7                 | M8                 | M1                 | M2                 | M3                 | M4                 | M5                 | M6                 | M7                 | M8                 |
| WT GP <sub>ECTO</sub> -foldon            | >10 <sup>3</sup> * | >10 <sup>3</sup> * | >10 <sup>3</sup> * | >10 <sup>3</sup> * | >10 <sup>3</sup>   | >10 <sup>3</sup>   | 445                | 616                | 862                | >10 <sup>3</sup>   | 15                 | 649                | 143                | >10 <sup>3</sup>   | 632                | >10 <sup>3</sup>   |
| GPΔmuc-foldon                            | >10 <sup>3</sup> * | >10 <sup>3</sup> * | >10 <sup>3</sup> * | >10 <sup>3</sup> * | 102                | >10 <sup>3</sup>   | 282                | 110                | 252                | 788 *              | >10 <sup>3</sup> * | 23                 | 27                 | 380                | 795                | 115                |
| GPΔmuc-WL2P2-foldon                      | >10 <sup>3</sup>   | >10 <sup>3</sup> * | >10 <sup>3</sup>   | >10 <sup>3</sup>   | >10 <sup>3</sup>   | >10 <sup>3</sup>   | —                  | 132                | 40                 | >10 <sup>3</sup> * | 131                | 107                | 121                | 43                 | —                  | 55                 |
| GPΔmuc-WL2P2-5GS-FR                      | 408                | 136                | 250                | >10 <sup>3</sup> * | 609                | —                  | 82                 | 105                | 582                | 130                | >10 <sup>3</sup> * | >10 <sup>3</sup> * | >10 <sup>3</sup> * | —                  | 95                 | 395                |
| GPΔmuc-WL2P2-E2p-L4P                     | 76                 | 131                | 94                 | 140                | 141                | 100                | 85                 | 185                | >10 <sup>3</sup>   | 31                 | 23                 | 486                | 31                 | 16                 | 346                | 65                 |
| GPΔmuc-WL2P2-10GS-I3-01-L7P <sup>2</sup> | >10 <sup>3</sup> * | >10 <sup>3</sup> * | >10 <sup>3</sup> * | >10 <sup>3</sup> * | >10 <sup>3</sup> * | >10 <sup>3</sup> * | >10 <sup>3</sup> * | >10 <sup>3</sup> * | >10 <sup>3</sup> * | 318                | >10 <sup>3</sup> * | 782                | >10 <sup>3</sup> * | >10 <sup>3</sup> * | >10 <sup>3</sup> * | >10 <sup>3</sup> * |

<sup>1</sup> Purified mouse IgG was tested in ebolavirus-pp neutralization assays against a Makona strain and a BDBV strain. Approximate IC<sub>50</sub> values were derived from the fitting of %neutralization data. (\*): %neutralization < -30%, indicative of enhancement-causing non-NAb response. (—): animal death. Color coding (red-green): potency (high-low).  
<sup>2</sup> GPΔmuc-WL2P2-10GS-I3-01-L7P was purified by mAb100 only due to its low yield, whereas other nanoparticles were purified by mAb100 followed by SEC.

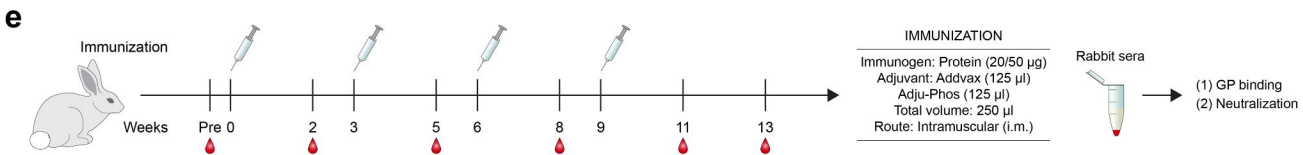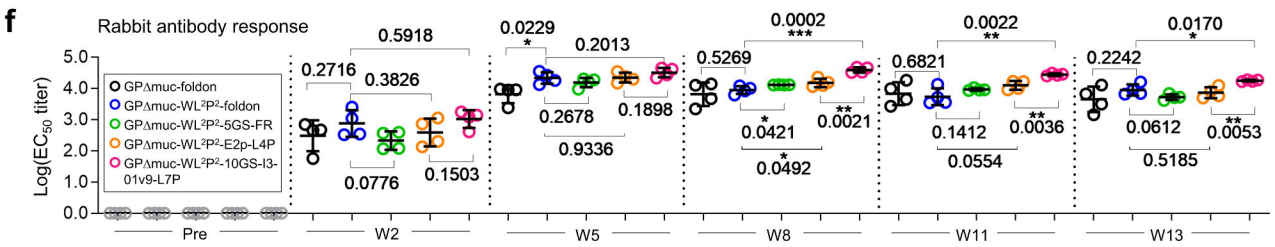

**g**

GP trimer and nanoparticle-induced mixed NAb/non-NAb response in rabbits at week 13 <sup>1</sup>

|                                          | EBOV-Makona |       |       |       | BDBV-Uganda |    |    |    |
|------------------------------------------|-------------|-------|-------|-------|-------------|----|----|----|
|                                          | R1          | R2    | R3    | R4    | R1          | R2 | R3 | R4 |
| GPΔmuc-foldon                            | 332         | >1000 | 278   | >1000 | 12          | 18 | 19 | 58 |
| GPΔmuc-WL2P2-foldon                      | 309         | 399   | >1000 | 541   | 9           | 14 | 27 | 42 |
| GPΔmuc-WL2P2-5GS-FR                      | 507         | 299   | 349   | 475   | 43          | 17 | 16 | 26 |
| GPΔmuc-WL2P2-E2p-L4P                     | 454         | 325   | >1000 | 432   | 24          | 11 | 41 | 14 |
| GPΔmuc-WL2P2-10GS-I3-01-L7P <sup>2</sup> | 216         | 141   | 257   | 231   | 18          | 10 | 9  | 10 |

<sup>1</sup> Purified rabbit IgG was tested in ebolavirus-pp neutralization assays against a Makona strain and a BDBV strain. Approximate IC<sub>50</sub> values were derived from the fitting of %neutralization data. Color coding: potency.  
<sup>2</sup> GPΔmuc-WL2P2-10GS-I3-01-L7P was also purified by mAb100 followed by SEC.

**a**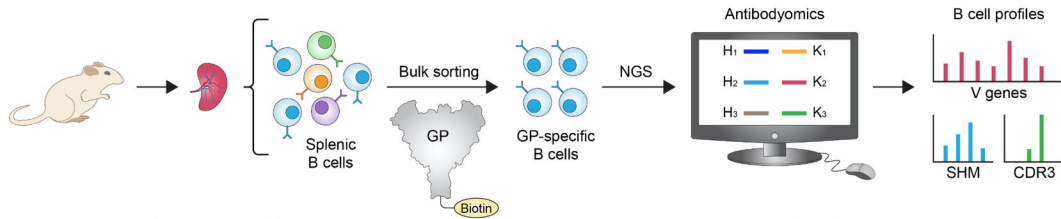**b**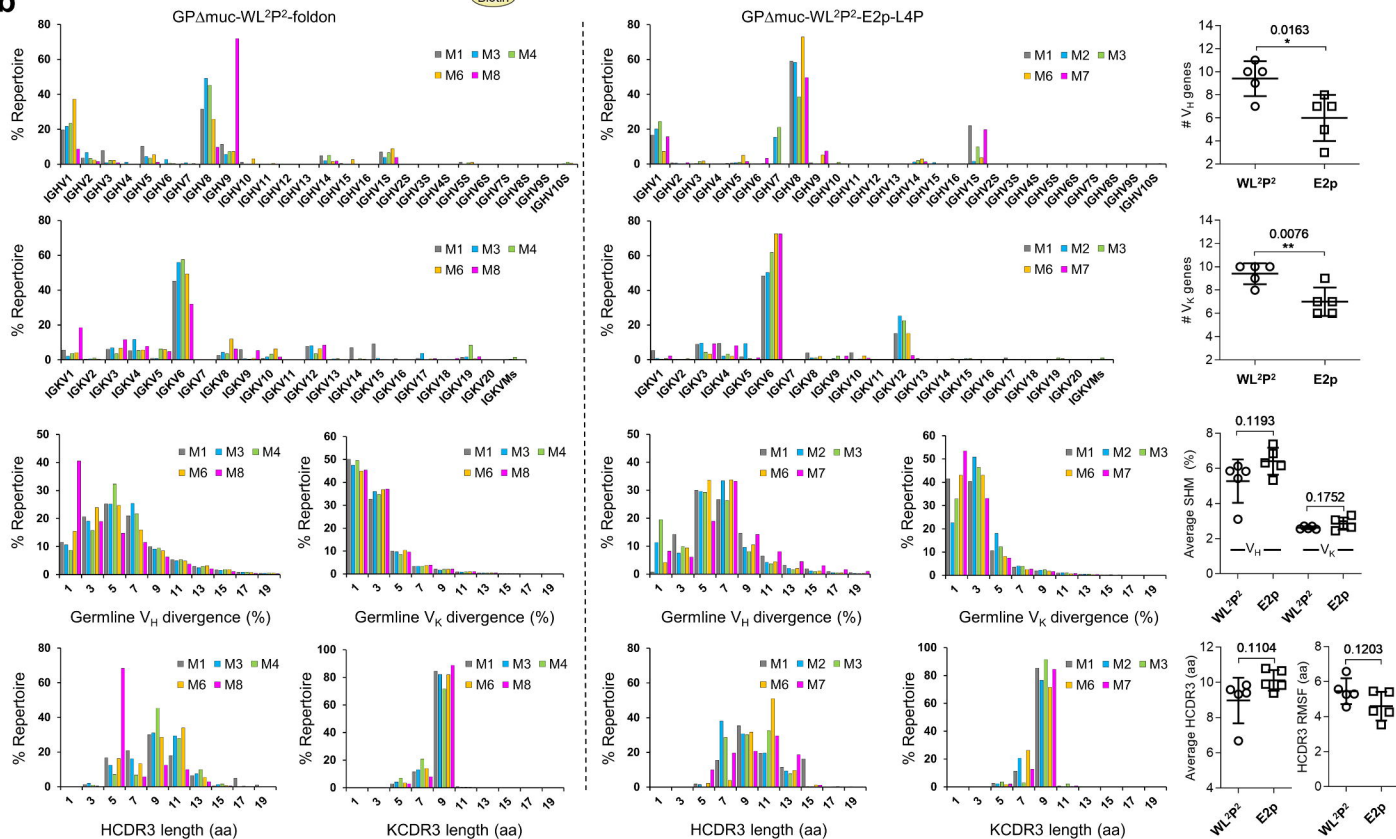

Source: https://www.biorxiv.org/content/10.1101/2020.08.22.262634v2.full.pdf
